# Supplementary material
Source: Royal Society of Chemistry journal article supplement (doi:10.1039/d6cc02273a)
Supplement: d6cc02273a1.pdf [file d6cc02273a1.pdf]

## Supporting information

### Synergistic acid-base bifunctional covalent organic framework for efficient tandem catalysis

Xue-Tian Li,<sup>†</sup> Xue-Qi Qi,<sup>†</sup> Zi-Yu, Gao, Meng-Jing Li, Hui-Chao Ma,\* and Gong-Jun Chen\*

*College of Chemistry, Chemical Engineering and Materials Science, Shandong Normal University, Jinan 250014, P. R. China.*

Corresponding author.

*E-mail address:* huichaoma@sdu.edu.cn and gongjunchen@sdu.edu.cn..

#### I. Instruments and methods

The reagents and solvents employed were commercially available and used without further purification. The powder diffractometer (XRD) patterns were collected by a D8 ADVANCE X-ray with Cu K $\alpha$  radiation ( $\lambda = 1.5405 \text{ \AA}$ ). The total surface areas of the COFs were measured by the BET (Brunauer–Emmer–Teller) method using N<sub>2</sub> adsorption at 77 K, this was done by the Micromeritics ASAP 2000 sorption/desorption analyzer. Infrared (IR) samples were prepared as KBr pellets, and spectra were obtained in the 400–4000 cm<sup>-1</sup> range using a Perkin-Elmer 1600 FTIR spectrometer. <sup>13</sup>C NMR spectra were recorded on a MERCURY plus 400 spectrometer operating at resonance frequencies of 400 MHz. Thermogravimetric analyses (TGA) were carried out under flowing nitrogen at a heating rate of 10 °C·min<sup>-1</sup> on a TA Instrument Q5 analyzer. TEM (transmission electron microscopy) analysis was performed on a JEOL 2100 Electron Microscope at an operating voltage of 200 kV. Scanning electron microscopy (SEM) images were taken on a SUB010 scanning electron microscope with acceleration voltage of 20 kV. Gas chromatography (GC) analysis was performed on an Agilent 7890B. NH<sub>3</sub>-TPD and CO<sub>2</sub>-TPD measurements were conducted on a Quantachrome CHEMBET PULSAR TPR/TPD chemisorption analyzer (instrument no. 2021103105, Quantachrome Instruments, USA) equipped with a thermal conductivity detector (TCD) and a mass spectrometer (MS).

## II. Material Synthesis

### Synthesis of hexa(4-formyl-phenoxy)cyclotriphosphazene

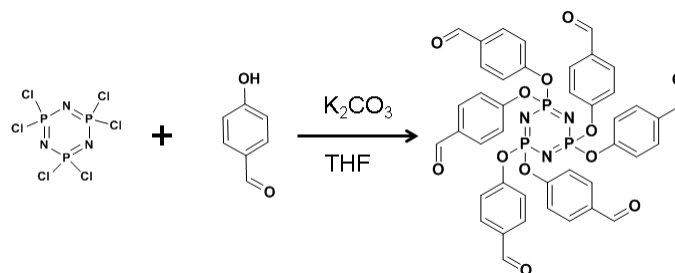

**Fig.S1** Synthesis reaction diagram of hexa(4-formyl-phenoxy)cyclotriphosphazene (CTP).

In a round bottom flask, 2.32 g (19.0 mmol) of p-hydroxybenzaldehyde was dissolved in 100 mL dry tetrahydrofuran (THF), 3.94 g (28.5 mmol) potassium carbonate was slowly added to the system, and stirred in an ice bath for 30 min under 0°C. Then, a 50 mL solution of hexachlorocyclotriphosphazene (1.00 g; 2.9 mmol) in dry THF was slowly added, and the stirring was continued for 2 hours in an ice bath. After 2 hours, the ice bath was taken out, and the reaction was conducted at room temperature for 2 days. and the solvent was removed under reduced pressure to yield a white solid. The obtained solid was washed with dichloromethane, A white solid was obtained after removing the solvent under reduced pressure and the product was purified directly by chromatography on silica gel using dichloromethane / ethyl acetate (20:1) as the eluent to give the hexa(4-formyl-phenoxy)cyclotriphosphazene (CTP) white powder in 89% yield. <sup>1</sup>H NMR (CDCl<sub>3</sub>, 400 MHz) δ (ppm) 9.96 (s, 6H), 7.75 (d, 12H), 7.17 (d, 12H).

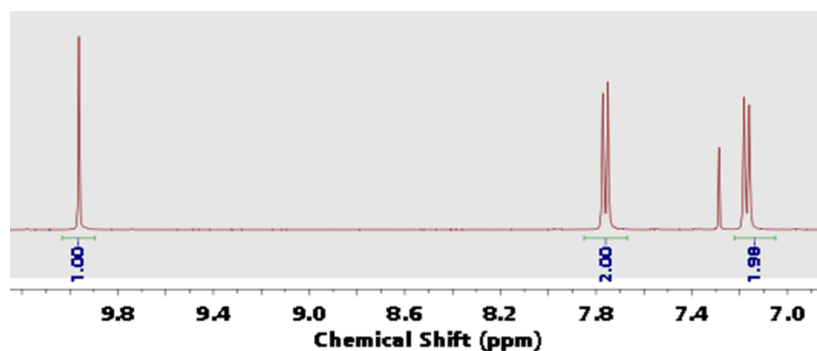

**Fig. S2** <sup>1</sup>H NMR spectra of CTP in CDCl<sub>3</sub>.

### Synthesis of CTP-DABA-COF

Hexa(4-formyl-phenoxy)cyclotriphosphazene (CTP, 16.80 mg, 0.02 mmol) and 3, 5-Diaminobenzoic acid (DABA, 9.12 mg, 0.06 mmol) were dissolved in a mixed solvent system of 1, 2-dichlorobenzene/mesitylene/ethanol (1:1:1, v/v/v) with 6 M AcOH (100  $\mu$ L) as catalyst. After sonication (10 min), the sealed Pyrex vessel was heated at 90°C for 3 days and slowly cooled for 1 day. The product was washed (DMF/THF/EtOH) and dried in vacuo to obtain CTP-DABA-COF as gray powder (89% yield).

#### **Synthesis of CTP -MPD-COF**

Hexa(4-formyl-phenoxy)cyclotriphosphazene (CTP, 16.80 mg, 0.02 mmol) and m-phenylenediamine (MPD, 9.12 mg, 0.06 mmol) were dissolved in a mixed solvent system of 1, 2-dichlorobenzene/mesitylene/ethanol (1:1:1, v/v) with 6 M AcOH (100  $\mu$ L) as catalyst. After sonication (10 min), the sealed vessel was heated at 90°C for 3 days and slowly cooled for 1 day. The product was washed (DMF/THF/EtOH) and dried in vacuo to obtain CTP -MPD-COF as yellow powder (92% yield).

#### **Tandem reaction catalyzed by CTP-DABA-COF**

The catalytic reaction was performed by combining benzaldehyde dimethyl acetal (150  $\mu$ L, 1.0 mmol) and malononitrile (66.0 mg, 1.0 mmol) with CTP-DABA-COF catalyst (11.9 mg, 1.0 mol%) were placed in a 2 mL glass vessel, which was then capped and heated at 50°C under H<sub>2</sub>O (2 mL) conditions for 5 h. Upon completion, the reaction was cooled to room temperature and the conversion was quantitatively analyzed by GC. The crude product was then purified by column chromatography using petroleum ether/ethyl acetate (6:1, v/v) as the eluent.

#### **Multicomponent tandem reaction catalyzed by CTP -MPD-COF**

benzaldehyde dimethyl acetal (150  $\mu$ L, 1.0 mmol) and malononitrile (66.0 mg, 1.0 mmol), 4-hydroxy-6-methyl-2-pyrone (128.1mg, 1.00mmol) with CTP-MPD-COF catalyst (11.9 mg, 1.0 mol%) were placed in a 2 mL glass vessel, which was then capped and heated at 50°C under H<sub>2</sub>O:EtOH (1:1, 2 mL) conditions for 7 h. After the reaction was complete, the mixture was cooled to room temperature. The crude

product was then purified by column chromatography using petroleum ether/ethyl acetate (6:1, v/v) as the eluent. The conversion was then determined based on the isolated yield.

### **Stepwise catalysis comparative experiment by CTP -MPD-COF CTP-DABA-COF, CTP-MPD-COF or HCCTP**

Step 1: benzaldehyde dimethylacetal (150  $\mu$ L, 1.0 mmol) was catalyzed by **CTP-DABA-COF** (11.9 mg), **CTP-MPD-COF** (10.6 mg, 1 mol %) or **HCCTP** (3.47 mg) at 50 °C in water (2 mL).

Step 2: benzaldehyde (102  $\mu$ L, 1.0 mmol) and malononitrile (0.72 g, 1.1 mmol) were catalyzed by **CTP-DABA-COF** (11.9 mg, 1 mol %), **CTP -MPD-COF** (10.6 mg) or **HCCTP** (3.47 mg) at 50°C in water (2 mL).

Step 3: benzylidenemalononitrile (154mg, 1.0 mmol) and 4-hydroxy-6-methyl-2-pyrone (128.1 mg, 1.0 mmol) were catalyzed by **CTP-DABA-COF** (11.9 mg, 1 mol %), **CTP -MPD-COF** (10.6 mg) or **HCCTP** (3.47 mg) at 50 °C in mixed solvent of EtOH (1 mL) and water (1 mL). b: Yield was determined by GC analysis and c: Yield was monitored by isolated yields.

### **Catalytic Experiments of CTP-DABA-COF at Various pH Conditions**

To minimize the interference of buffer anions on the acid-base bifunctional active sites of the COF and maintain stable pH during the reaction, different buffer systems with suitable buffering ranges and inert ion components were employed. Buffer solutions with pH values of 5, 6, 7, 8, and 9 were prepared using citrate-phosphate buffer (pH=5), phosphate buffer ( $\text{NaH}_2\text{PO}_4\text{-Na}_2\text{HPO}_4$ , pH=6, 7), and borate buffer (pH=8, 9), respectively. Each buffer solution (50 mL) was transferred into clean volumetric flasks, diluted to the mark, and shaken well for later use. The actual pH values were calibrated using a pH meter to ensure the error was within  $\pm 0.02$ . Catalytic reaction conditions: benzaldehyde dimethylacetal (150  $\mu$ L, 1.0 mmol) and malononitrile (66 mg, 1.0 mmol) were stirred for 5 h in 2 mL of buffer solutions with different pH values in the presence of CTP-DABA-COF (11.9 mg, 1 mol%). After

simple filtration and extraction, the yield was determined by gas chromatography (GC) analysis.

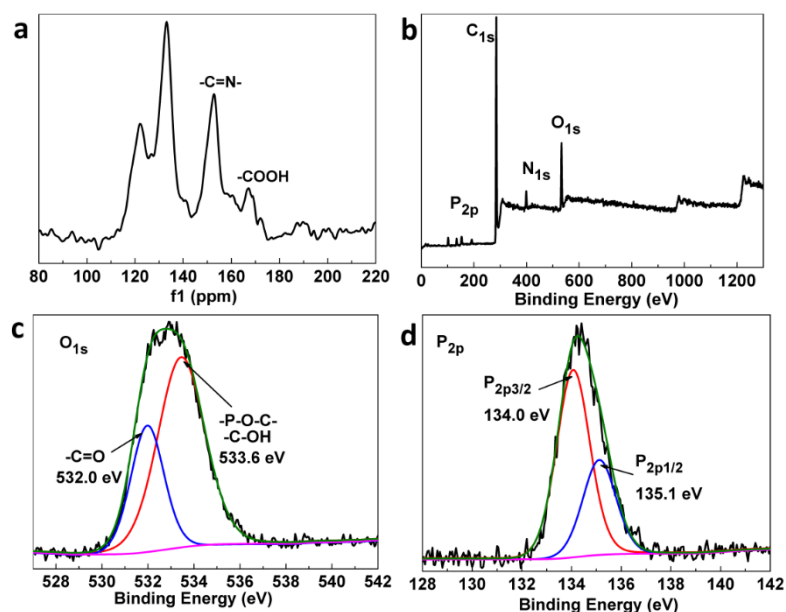

**Fig. S3** (a) Solid-state  $^{13}\text{C}$  CP-MAS NMR spectra, (b) survey scan XPS profile, the high resolution XPS spectra of O 1s (c) and P 2p (d) of **CTP-DABA-COF**.

### III. Simulated Structure of CTP-DABA-COF

Structural modeling of **CTP-DABA-COF** was generated using the Materials Studio (ver. 2018) suite of programs. Molecular geometry optimization was performed with MS DMol3 module. The initial lattice was created by starting with the space group P1. The a and b lattice parameters (initially 37.2204 Å) were estimated according to the center to center distance between the vertices of COF. The constructed model was geometry optimized using the Forcite module (Universal force fields, Ewald summations). Then the calculated PXRD pattern was generated with the Reflex Plus module. Finally, Pawley refinement was applied for profile fitting, producing the refined PXRD profile with the lattice parameters of  $a = b = 30.3180$  Å and  $c = 11.5320$  Å,  $\alpha = \beta = 90^\circ$  and  $\gamma = 120^\circ$ . Rwp and Rp values converged to 0.76 and 0.49 %, respectively. Reflex Module in Material Studio using data from  $2\theta = 2.0$ - $30^\circ$ . Backgrounds were first refined applying a 2nd order Chebyshev Polynomial.

**Table S1.** Simulated structure of **CTP-DABA-COF** based on AA-stacking

|                |
|----------------|
| space group P1 |
|----------------|

| $a = b = 45.0000 \text{ \AA}, c = 5.0000 \text{ \AA},$<br>$\alpha = \beta = 90^\circ$ and $\gamma = 120^\circ$ |          |         |         |      |         |          |         |
|----------------------------------------------------------------------------------------------------------------|----------|---------|---------|------|---------|----------|---------|
| Atom                                                                                                           | x/a      | y/b     | z/c     | Atom | x/a     | y/b      | z/c     |
| P1                                                                                                             | 0.29381  | 0.67686 | 0.46613 | C130 | 1.00876 | 0.42074  | 0.14317 |
| N2                                                                                                             | 0.3226   | 0.6667  | 0.28151 | O131 | 0.98075 | 0.39501  | 0.06577 |
| P3                                                                                                             | 0.36497  | 0.67666 | 0.39749 | O132 | 1.03699 | 0.42305  | 0.07127 |
| N4                                                                                                             | 0.38492  | 0.72195 | 0.46688 | O133 | 0.61608 | 0.28526  | 0.16634 |
| P5                                                                                                             | 0.36519  | 0.74788 | 0.52305 | O134 | 0.65227 | 0.28841  | 0.64569 |
| N6                                                                                                             | 0.32285  | 0.71636 | 0.64479 | C135 | 0.64333 | 0.25189  | 0.58642 |
| O7                                                                                                             | 0.26111  | 0.6836  | 0.27132 | C136 | 0.58873 | 0.24882  | 0.23466 |
| O8                                                                                                             | 0.26395  | 0.63806 | 0.67376 | C137 | 0.55546 | 0.23684  | 0.35476 |
| C9                                                                                                             | 0.2265   | 0.61355 | 0.62107 | C138 | 0.52924 | 0.20012  | 0.37875 |
| C10                                                                                                            | 0.22373  | 0.67089 | 0.33676 | C139 | 0.53282 | 0.17173  | 0.27924 |
| C11                                                                                                            | 0.21002  | 0.69244 | 0.41541 | C140 | 0.56469 | 0.18401  | 0.14927 |
| C12                                                                                                            | 0.17317  | 0.6809  | 0.42476 | C141 | 0.59051 | 0.22026  | 0.13358 |
| C13                                                                                                            | 0.14599  | 0.64716 | 0.34639 | C142 | 0.66731 | 0.24004  | 0.54522 |
| C14                                                                                                            | 0.15959  | 0.62655 | 0.25783 | C143 | 0.65771 | 0.20361  | 0.54553 |
| C15                                                                                                            | 0.19618  | 0.63835 | 0.25275 | C144 | 0.62365 | 0.17526  | 0.59817 |
| C16                                                                                                            | 0.21217  | 0.58436 | 0.44675 | C145 | 0.60076 | 0.18724  | 0.65073 |
| C17                                                                                                            | 0.17515  | 0.55981 | 0.42764 | C146 | 0.61062 | 0.22333  | 0.64474 |
| C18                                                                                                            | 0.14887  | 0.56117 | 0.58376 | C147 | 0.61369 | 0.13556  | 0.58801 |
| C19                                                                                                            | 0.16348  | 0.58904 | 0.76396 | N148 | 0.58457 | 0.10544  | 0.64595 |
| C20                                                                                                            | 0.20019  | 0.6134  | 0.7784  | C149 | 0.57915 | 0.06929  | 0.61075 |
| C21                                                                                                            | 0.10584  | 0.63549 | 0.37486 | C150 | 0.50402 | 0.13176  | 0.3204  |
| N22                                                                                                            | 0.07561  | 0.60724 | 0.30252 | N151 | 0.50105 | 0.10119  | 0.24462 |
| C23                                                                                                            | 0.03944  | 0.60083 | 0.36152 | C152 | 0.47154 | 0.06516  | 0.31419 |
| C24                                                                                                            | 0.03683  | 0.62534 | 0.51693 | C153 | 0.60565 | 0.06629  | 0.48947 |
| C25                                                                                                            | 0.00534  | 0.62216 | 0.59533 | C154 | 0.6035  | 0.03459  | 0.43576 |
| C26                                                                                                            | -0.02606 | 0.59369 | 0.51793 | C155 | 0.57411 | 0.0034   | 0.50428 |
| C27                                                                                                            | -0.02859 | 0.56663 | 0.36211 | C156 | 0.54508 | 0.00147  | 0.62611 |
| C28                                                                                                            | 0.00546  | 0.57058 | 0.28192 | C157 | 0.54785 | 0.03565  | 0.67787 |
| N29                                                                                                            | -0.06479 | 0.53712 | 0.29893 | C158 | 0.44517 | 0.06299  | 0.47677 |
| C30                                                                                                            | -0.0949  | 0.53375 | 0.39129 | C159 | 0.41731 | 0.03169  | 0.56415 |
| C31                                                                                                            | 0.00525  | 0.64944 | 0.76047 | C160 | 0.41385 | 0.00001  | 0.48827 |
| O32                                                                                                            | -0.02287 | 0.64714 | 0.83442 | C161 | 0.43751 | -0.00307 | 0.32601 |
| O33                                                                                                            | 0.03338  | 0.67565 | 0.83154 | C162 | 0.46739 | 0.03084  | 0.23861 |
| P34                                                                                                            | 0.6482   | 0.38966 | 0.53071 | N163 | 0.51423 | -0.03425 | 0.67573 |
| N35                                                                                                            | 0.62843  | 0.344   | 0.47857 | C164 | 0.51302 | -0.06484 | 0.63557 |
| P36                                                                                                            | 0.64826  | 0.31871 | 0.4036  | N165 | 0.43059 | -0.03954 | 0.2685  |
| N37                                                                                                            | 0.69043  | 0.35089 | 0.28326 | C166 | 0.40296 | -0.06962 | 0.35241 |
| P38                                                                                                            | 0.71947  | 0.39003 | 0.46542 | C167 | 0.63256 | 0.03412  | 0.30033 |
| N39                                                                                                            | 0.69057  | 0.40017 | 0.65021 | O168 | 0.63113 | 0.00575  | 0.24656 |
| O40                                                                                                            | 0.65212  | 0.42113 | 0.26447 | O169 | 0.65924 | 0.06198  | 0.23386 |

|     |         |         |         |      |          |         |          |
|-----|---------|---------|---------|------|----------|---------|----------|
| O41 | 0.61648 | 0.39331 | 0.76364 | C170 | 0.39095  | 0.03199 | 0.74003  |
| C42 | 0.58706 | 0.39949 | 0.69119 | O171 | 0.36558  | 0.004   | 0.8228   |
| C43 | 0.64289 | 0.44883 | 0.29914 | O172 | 0.39323  | 0.06023 | 0.8105   |
| C44 | 0.66219 | 0.48145 | 0.43432 | O173 | 1.36112  | 0.77626 | 0.26496  |
| C45 | 0.65149 | 0.5076  | 0.43923 | O174 | 1.39732  | 0.78324 | 0.75278  |
| C46 | 0.62135 | 0.50455 | 0.3061  | H175 | 0.2281   | 0.72025 | 0.47525  |
| C47 | 0.60408 | 0.47332 | 0.16247 | H176 | 0.16416  | 0.69907 | 0.49805  |
| C48 | 0.61481 | 0.4476  | 0.15988 | H177 | 0.14164  | 0.59925 | 0.18574  |
| C49 | 0.55126 | 0.37551 | 0.73937 | H178 | 0.20183  | 0.61809 | 0.16992  |
| C50 | 0.52406 | 0.38469 | 0.73999 | H179 | 0.22971  | 0.57924 | 0.31382  |
| C51 | 0.52981 | 0.41913 | 0.70625 | H180 | 0.16526  | 0.53752 | 0.28041  |
| C52 | 0.56481 | 0.44275 | 0.6656  | H181 | 0.14634  | 0.59337 | 0.90778  |
| C53 | 0.59112 | 0.43303 | 0.66388 | H182 | 0.20692  | 0.63398 | 0.9372   |
| C54 | 0.49943 | 0.42816 | 0.69841 | H183 | 0.09796  | 0.65317 | 0.47662  |
| N55 | 0.49885 | 0.45815 | 0.71348 | H184 | 0.06104  | 0.64939 | 0.58649  |
| C56 | 0.46743 | 0.46247 | 0.67997 | H185 | -0.05127 | 0.59177 | 0.58224  |
| C57 | 0.60942 | 0.53298 | 0.33257 | H186 | 0.00467  | 0.54918 | 0.15456  |
| N58 | 0.58219 | 0.53575 | 0.24116 | H187 | -0.09453 | 0.55409 | 0.52939  |
| C59 | 0.57543 | 0.56548 | 0.29559 | H188 | 0.02803  | 0.69072 | 0.98008  |
| C60 | 0.437   | 0.43408 | 0.58595 | H189 | 0.68693  | 0.48799 | 0.54398  |
| C61 | 0.40686 | 0.43526 | 0.53187 | H190 | 0.66737  | 0.53256 | 0.55408  |
| C62 | 0.40551 | 0.46553 | 0.57094 | H191 | 0.58031  | 0.46708 | 0.03959  |
| C63 | 0.43338 | 0.4963  | 0.66411 | H192 | 0.59779  | 0.4246  | 0.02805  |
| C64 | 0.4653  | 0.49449 | 0.71838 | H193 | 0.54242  | 0.34738 | 0.78043  |
| C65 | 0.59999 | 0.59321 | 0.44665 | H194 | 0.49612  | 0.36392 | 0.76854  |
| C66 | 0.597   | 0.62196 | 0.51564 | H195 | 0.57369  | 0.47103 | 0.63189  |
| C67 | 0.56842 | 0.62466 | 0.4364  | H196 | 0.6178   | 0.4563  | 0.63655  |
| C68 | 0.54129 | 0.59962 | 0.28287 | H197 | 0.47165  | 0.40675 | 0.67607  |
| C69 | 0.54529 | 0.56921 | 0.21063 | H198 | 0.62572  | 0.55751 | 0.45131  |
| N70 | 0.42854 | 0.52759 | 0.68193 | H199 | 0.43592  | 0.40854 | 0.5499   |
| C71 | 0.39848 | 0.52768 | 0.64843 | H200 | 0.38085  | 0.46589 | 0.52632  |
| C72 | 0.38889 | 0.55765 | 0.64137 | H201 | 0.48866  | 0.51903 | 0.79218  |
| N73 | 0.51158 | 0.60597 | 0.21467 | H202 | 0.62398  | 0.59325 | 0.52061  |
| C74 | 0.50848 | 0.63353 | 0.29057 | H203 | 0.56649  | 0.64806 | 0.4969   |
| C75 | 0.47963 | 0.64472 | 0.24969 | H204 | 0.5239   | 0.54837 | 0.08475  |
| C76 | 0.44806 | 0.62553 | 0.1149  | H205 | 0.37348  | 0.50247 | 0.61751  |
| C77 | 0.42232 | 0.63605 | 0.09619 | H206 | 0.52972  | 0.65519 | 0.4118   |
| C78 | 0.42378 | 0.66606 | 0.20517 | H207 | 0.4416   | 0.60033 | 0.01314  |
| C79 | 0.45657 | 0.68677 | 0.33471 | H208 | 0.39736  | 0.61939 | -0.01664 |
| C80 | 0.48283 | 0.67625 | 0.35687 | H209 | 0.46322  | 0.71259 | 0.42602  |
| C81 | 0.41244 | 0.59282 | 0.61366 | H210 | 0.5071   | 0.69518 | 0.46858  |
| C82 | 0.40254 | 0.61895 | 0.60098 | H211 | 0.44108  | 0.60221 | 0.59984  |
| C83 | 0.36889 | 0.61426 | 0.60246 | H212 | 0.42306  | 0.6472  | 0.58796  |

|      |         |         |         |      |         |          |         |
|------|---------|---------|---------|------|---------|----------|---------|
| C84  | 0.34471 | 0.57834 | 0.64007 | H213 | 0.3162  | 0.5692   | 0.66228 |
| C85  | 0.35416 | 0.55144 | 0.65264 | H214 | 0.33175 | 0.52411  | 0.67268 |
| O86  | 0.39578 | 0.67458 | 0.14941 | H215 | 0.40356 | 0.38203  | 0.3863  |
| O87  | 0.36108 | 0.643   | 0.64813 | H216 | 0.66359 | 0.66609  | 0.91875 |
| C88  | 0.37614 | 0.40428 | 0.42666 | H217 | 0.47028 | 0.81085  | 0.63288 |
| O89  | 0.3491  | 0.40521 | 0.36501 | H218 | 0.51639 | 0.87386  | 0.60313 |
| O90  | 0.37658 | 0.37641 | 0.39342 | H219 | 0.4393  | 0.90415  | 0.72123 |
| C91  | 0.62448 | 0.6498  | 0.67723 | H220 | 0.39523 | 0.84545  | 0.73691 |
| O92  | 0.62236 | 0.67601 | 0.74475 | H221 | 0.32416 | 0.80704  | 0.52782 |
| O93  | 0.65053 | 0.64781 | 0.75216 | H222 | 0.3432  | 0.871    | 0.54389 |
| C94  | 0.37048 | 0.81304 | 0.31156 | H223 | 0.4353  | 0.89494  | 0.08757 |
| C95  | 0.42548 | 0.81913 | 0.67431 | H224 | 0.41889 | 0.83535  | 0.07871 |
| C96  | 0.46135 | 0.83046 | 0.64669 | H225 | 1.10805 | 0.51469  | 0.39139 |
| C97  | 0.48853 | 0.86684 | 0.63433 | H226 | 1.06415 | 0.47589  | 0.3257  |
| C98  | 0.48302 | 0.89575 | 0.65907 | H227 | 0.95188 | 0.42074  | 0.32888 |
| C99  | 0.44815 | 0.88461 | 0.69557 | H228 | 1.00733 | 0.51674  | 0.78936 |
| C100 | 0.42173 | 0.84866 | 0.70309 | H229 | 0.90846 | 0.41182  | 0.41987 |
| C101 | 0.34985 | 0.82571 | 0.43232 | H230 | 0.86785 | 0.47103  | 0.05733 |
| C102 | 0.36025 | 0.86246 | 0.44029 | H231 | 0.80378 | 0.42896  | 0.03607 |
| C103 | 0.39146 | 0.89013 | 0.32401 | H232 | 0.78351 | 0.48968  | 0.60306 |
| C104 | 0.4104  | 0.87689 | 0.1961  | H233 | 0.8453  | 0.53097  | 0.63858 |
| C105 | 0.40003 | 0.84056 | 0.19282 | H234 | 0.87105 | 0.46567  | 0.78521 |
| C106 | 1.10855 | 0.53396 | 0.54193 | H235 | 0.80706 | 0.4439   | 0.79723 |
| N107 | 1.07856 | 0.5301  | 0.64056 | H236 | 0.78593 | 0.3492   | 0.40639 |
| C108 | 1.04237 | 0.50124 | 0.56888 | H237 | 0.84744 | 0.36926  | 0.37716 |
| C109 | 1.03989 | 0.4752  | 0.40079 | H238 | 1.05853 | 0.44466  | 0.17882 |
| C110 | 1.00852 | 0.44737 | 0.31566 | H239 | 0.54831 | 0.25606  | 0.43704 |
| C111 | 0.97699 | 0.44377 | 0.39804 | H240 | 0.50379 | 0.19226  | 0.48213 |
| C112 | 0.97427 | 0.46733 | 0.5646  | H241 | 0.57125 | 0.16521  | 0.04982 |
| C113 | 1.00827 | 0.49696 | 0.65258 | H242 | 0.6145  | 0.22442  | 0.02391 |
| N114 | 0.93799 | 0.46045 | 0.62773 | H243 | 0.69559 | 0.25931  | 0.50969 |
| C115 | 0.90794 | 0.43283 | 0.54367 | H244 | 0.67789 | 0.19601  | 0.50189 |
| C116 | 0.86765 | 0.42059 | 0.57546 | H245 | 0.57282 | 0.16829  | 0.70133 |
| C117 | 0.86478 | 0.50592 | 0.35493 | H246 | 0.5882  | 0.22742  | 0.69468 |
| C118 | 0.85045 | 0.47652 | 0.18887 | H247 | 0.63349 | 0.12838  | 0.52045 |
| C119 | 0.8138  | 0.45209 | 0.17491 | H248 | 0.47956 | 0.12467  | 0.43658 |
| C120 | 0.78718 | 0.45324 | 0.31978 | H249 | 0.63048 | 0.09032  | 0.42926 |
| C121 | 0.80125 | 0.48369 | 0.48065 | H250 | 0.57309 | -0.02197 | 0.46113 |
| C122 | 0.83821 | 0.50842 | 0.49827 | H251 | 0.52463 | 0.03523  | 0.77309 |
| C123 | 0.85348 | 0.43952 | 0.69129 | H252 | 0.4456  | 0.08738  | 0.54493 |
| C124 | 0.81676 | 0.42749 | 0.69898 | H253 | 0.39082 | -0.02496 | 0.55956 |
| C125 | 0.78947 | 0.39607 | 0.59433 | H254 | 0.48751 | 0.02956  | 0.10833 |
| C126 | 0.80368 | 0.37606 | 0.48781 | H255 | 0.53711 | -0.06528 | 0.57127 |

|      |         |         |         |      |         |          |         |
|------|---------|---------|---------|------|---------|----------|---------|
| C127 | 0.84068 | 0.38799 | 0.47519 | H256 | 0.38159 | -0.06917 | 0.4715  |
| O128 | 0.74977 | 0.42918 | 0.26224 | H257 | 0.66127 | 0.08329  | 0.35912 |
| O129 | 0.75188 | 0.38269 | 0.65862 | H258 | 0.36712 | 0.05637  | 0.84278 |

**Table S2.** Simulated structure of **CTP-DABA-COF** based on AB-stacking

| space group <i>P1</i>                                                        |          |         |          |      |          |         |         |
|------------------------------------------------------------------------------|----------|---------|----------|------|----------|---------|---------|
| $a = 38.7971 \text{ \AA}, b = 38.2150 \text{ \AA}, c = 10.0412 \text{ \AA},$ |          |         |          |      |          |         |         |
| $\alpha = 95.6312^\circ, \beta = 94.4678^\circ, \gamma = 122.6385^\circ$     |          |         |          |      |          |         |         |
| Atom                                                                         | x/a      | y/b     | z/c      | Atom | x/a      | y/b     | z/c     |
| P1                                                                           | 0.27859  | 0.65412 | 0.19568  | C259 | 0.023    | 0.86249 | 0.83049 |
| N2                                                                           | 0.30216  | 0.63571 | 0.28754  | O260 | 0.04645  | 0.96591 | 0.64008 |
| P3                                                                           | 0.35419  | 0.66355 | 0.29567  | O261 | 0.07172  | 0.97785 | 0.93401 |
| N4                                                                           | 0.37081  | 0.71453 | 0.3413   | C262 | 0.00277  | 0.66551 | 0.62491 |
| P5                                                                           | 0.35428  | 0.73332 | 0.22394  | O263 | -0.02954 | 0.66606 | 0.59939 |
| N6                                                                           | 0.31424  | 0.69149 | 0.11607  | O264 | 0.00113  | 0.63182 | 0.58787 |
| O7                                                                           | 0.239    | 0.6121  | 0.07163  | C265 | 0.35855  | 1.04113 | 0.6214  |
| O8                                                                           | 0.25929  | 0.67641 | 0.30578  | O266 | 0.35905  | 1.07477 | 0.6268  |
| C9                                                                           | 0.22472  | 0.64704 | 0.36007  | O267 | 0.39252  | 1.04332 | 0.62677 |
| C10                                                                          | 0.20368  | 0.61308 | 0.04143  | C268 | 0.07321  | 1.10984 | 0.55761 |
| C11                                                                          | 0.20596  | 0.6511  | 0.04477  | C269 | 0.05527  | 1.1206  | 0.85277 |
| C12                                                                          | 0.16999  | 0.65095 | 0.02185  | C270 | 0.09442  | 1.12913 | 0.90169 |
| C13                                                                          | 0.13132  | 0.61293 | -0.00701 | C271 | 0.1281   | 1.17047 | 0.94434 |
| C14                                                                          | 0.12879  | 0.57476 | -0.01494 | C272 | 0.12332  | 1.204   | 0.93928 |
| C15                                                                          | 0.16492  | 0.57493 | 0.00857  | C273 | 0.08402  | 1.19586 | 0.89677 |
| C16                                                                          | 0.21969  | 0.6099  | 0.39381  | C274 | 0.05009  | 1.15424 | 0.85471 |
| C17                                                                          | 0.18347  | 0.58006 | 0.4384   | C275 | 0.03825  | 1.11126 | 0.52392 |
| C18                                                                          | 0.15179  | 0.58685 | 0.4497   | C276 | 0.04295  | 1.14963 | 0.51199 |
| C19                                                                          | 0.15696  | 0.62425 | 0.41916  | C277 | 0.08248  | 1.1867  | 0.53179 |
| C20                                                                          | 0.19346  | 0.65434 | 0.3758   | C278 | 0.11753  | 1.18505 | 0.55865 |
| C21                                                                          | 0.09439  | 0.6145  | -0.02163 | C279 | 0.11283  | 1.14662 | 0.57055 |
| N22                                                                          | 0.05725  | 0.58093 | -0.0361  | C280 | -0.1991  | 0.8692  | 1.00997 |
| C23                                                                          | 0.02134  | 0.58295 | -0.04351 | N281 | -0.23295 | 0.86852 | 1.00528 |
| C24                                                                          | 0.0249   | 0.62171 | -0.03682 | C282 | -0.27167 | 0.83122 | 1.01713 |
| C25                                                                          | -0.01008 | 0.62363 | -0.03625 | C283 | -0.27576 | 0.79225 | 1.01195 |
| C26                                                                          | 0.95116  | 0.58641 | -0.04134 | C284 | -0.31446 | 0.75503 | 1.00742 |
| C27                                                                          | 0.94703  | 0.54741 | -0.04689 | C285 | 0.65054  | 0.75692 | 1.00822 |
| C28                                                                          | -0.01765 | 0.54601 | -0.04713 | C286 | 0.65405  | 0.79565 | 1.01457 |
| N29                                                                          | 0.90825  | 0.51007 | -0.03569 | C287 | -0.307   | 0.83258 | 1.0176  |
| C30                                                                          | 0.87439  | 0.50938 | -0.04066 | N288 | 0.61812  | 0.79762 | 1.00744 |
| C31                                                                          | -0.00589 | 0.66452 | -0.02197 | C289 | 0.58103  | 0.76403 | 0.99365 |
| O32                                                                          | 0.96212  | 0.66605 | -0.03454 | C290 | 0.54406  | 0.76553 | 0.9794  |

|     |         |         |         |      |          |         |         |
|-----|---------|---------|---------|------|----------|---------|---------|
| O33 | 0.02977 | 0.69866 | 0.00536 | C291 | 0.52331  | 0.79135 | 0.52333 |
| P34 | 0.63103 | 0.39246 | 0.16698 | C292 | 0.51817  | 0.75393 | 0.55353 |
| N35 | 0.61267 | 0.34077 | 0.15439 | C293 | 0.48171  | 0.72383 | 0.59709 |
| P36 | 0.63897 | 0.32973 | 0.26686 | C294 | 0.45048  | 0.73113 | 0.61334 |
| N37 | 0.68165 | 0.37579 | 0.34692 | C295 | 0.45548  | 0.76828 | 0.57985 |
| P38 | 0.71083 | 0.40773 | 0.24105 | C296 | 0.49165  | 0.79813 | 0.5351  |
| N39 | 0.68061 | 0.41676 | 0.13901 | C297 | 0.54653  | 0.80367 | 0.98692 |
| O40 | 0.60235 | 0.39922 | 0.03784 | C298 | 0.51035  | 0.80342 | 0.96379 |
| O41 | 0.62894 | 0.41216 | 0.3313  | C299 | 0.4716   | 0.76523 | 0.93172 |
| C42 | 0.59036 | 0.40583 | 0.3443  | C300 | 0.4694   | 0.72725 | 0.92881 |
| C43 | 0.60879 | 0.4393  | 0.05416 | C301 | 0.50542  | 0.72749 | 0.95136 |
| C44 | 0.64711 | 0.47592 | 0.11366 | O302 | 0.41599  | 0.70178 | 0.66802 |
| C45 | 0.65141 | 0.51476 | 0.13749 | O303 | 0.43621  | 0.7661  | 0.902   |
| C46 | 0.61763 | 0.51765 | 0.10193 | C304 | -0.31861 | 0.71416 | 0.99346 |
| C47 | 0.57968 | 0.48152 | 0.03873 | O305 | 0.64579  | 0.67999 | 0.96643 |
| C48 | 0.57542 | 0.44261 | 0.01438 | O306 | -0.28655 | 0.7127  | 1.00597 |
| C49 | 0.55305 | 0.36679 | 0.29599 | O307 | 0.33794  | 0.61509 | 0.66533 |
| C50 | 0.51501 | 0.36217 | 0.30356 | O308 | 0.27952  | 0.61566 | 0.83972 |
| C51 | 0.51376 | 0.39641 | 0.35903 | C309 | 0.27671  | 0.58039 | 0.8813  |
| C52 | 0.55094 | 0.43514 | 0.41015 | C310 | 0.30571  | 0.57375 | 0.60843 |
| C53 | 0.589   | 0.43967 | 0.40361 | C311 | 0.267    | 0.56408 | 0.54831 |
| C54 | 0.47343 | 0.39134 | 0.35817 | C312 | 0.23333  | 0.52233 | 0.51629 |
| N55 | 0.47071 | 0.42353 | 0.3867  | C313 | 0.23795  | 0.48975 | 0.54229 |
| C56 | 0.43204 | 0.42017 | 0.3845  | C314 | 0.27713  | 0.49894 | 0.5933  |
| C57 | 0.62226 | 0.55816 | 0.13912 | C315 | 0.31094  | 0.54086 | 0.62525 |
| N58 | 0.59126 | 0.56214 | 0.11789 | C316 | 0.31205  | 0.58157 | 0.93222 |
| C59 | 0.59438 | 0.60083 | 0.15875 | C317 | 0.30863  | 0.54541 | 0.96573 |
| C60 | 0.39423 | 0.38101 | 0.37152 | C318 | 0.26987  | 0.50764 | 0.95001 |
| C61 | 0.35676 | 0.37858 | 0.36644 | C319 | 0.23416  | 0.50645 | 0.9038  |
| C62 | 0.35723 | 0.41564 | 0.37195 | C320 | 0.23764  | 0.54286 | 0.87051 |
| C63 | 0.39483 | 0.45491 | 0.38447 | C321 | 0.26867  | 0.4699  | 0.97427 |
| C64 | 0.432   | 0.45688 | 0.39231 | N322 | 0.23476  | 0.43264 | 0.95603 |
| C65 | 0.63137 | 0.63689 | 0.22908 | C323 | 0.23568  | 0.39633 | 0.97368 |
| C66 | 0.63324 | 0.67395 | 0.27248 | C324 | 0.20029  | 0.44807 | 0.53742 |
| C67 | 0.59762 | 0.67457 | 0.24617 | N325 | 0.20074  | 0.41575 | 0.56362 |
| C68 | 0.56046 | 0.63866 | 0.17638 | C326 | 0.16306  | 0.37739 | 0.57564 |
| C69 | 0.55917 | 0.60205 | 0.133   | C327 | 0.27359  | 0.39961 | 0.99779 |
| N70 | 0.39623 | 0.49327 | 0.39158 | C328 | 0.27472  | 0.36409 | 1.00884 |
| C71 | 0.36477 | 0.49499 | 0.34967 | C329 | 0.23745  | 0.32488 | 0.99612 |
| C72 | 0.36806 | 0.53535 | 0.36467 | C330 | 0.19914  | 1.32077 | 0.97225 |
| N73 | 0.5233  | 0.63806 | 0.15268 | C331 | 0.1985   | 0.35666 | 0.95981 |
| C74 | 0.52047 | 0.66876 | 0.20332 | C332 | 0.12951  | 0.37821 | 0.61512 |
| C75 | 0.48163 | 0.66659 | 0.17948 | C333 | 0.09315  | 0.3413  | 0.63234 |

|      |          |         |          |      |          |         |          |
|------|----------|---------|----------|------|----------|---------|----------|
| C76  | 0.44721  | 0.63318 | 0.09035  | C334 | 0.09025  | 0.30312 | 0.60855  |
| C77  | 0.41003  | 0.63109 | 0.07373  | C335 | 0.12357  | 1.30164 | 0.57014  |
| C78  | 0.40677  | 0.66197 | 0.14697  | C336 | 0.16025  | 0.33907 | 0.55631  |
| C79  | 0.44169  | 0.69604 | 0.2332   | N337 | 0.16099  | 1.28007 | 0.95243  |
| C80  | 0.47889  | 0.69824 | 0.24913  | C338 | 0.16083  | 1.24665 | 0.96756  |
| C81  | 0.40145  | 0.57089 | 0.45028  | N339 | 0.12114  | 1.26269 | 0.55254  |
| C82  | 0.40373  | 0.60878 | 0.46753  | C340 | 0.08583  | 1.22681 | 0.5376   |
| C83  | 0.37317  | 0.61203 | 0.39832  | C341 | 0.31461  | 0.36773 | 1.02848  |
| C84  | 0.33967  | 0.57644 | 0.3119   | O342 | 0.31554  | 0.33509 | 1.0323   |
| C85  | 0.33713  | 0.53824 | 0.29566  | O343 | 0.34847  | 0.4035  | 1.04054  |
| O86  | 0.36836  | 0.65738 | 0.13619  | C344 | 0.05905  | 0.34289 | 0.6804   |
| O87  | 0.37638  | 0.6504  | 0.42551  | O345 | 0.02415  | 0.3091  | 0.68025  |
| C88  | 0.31727  | 0.33749 | 0.35512  | O346 | 0.06453  | 0.37811 | 0.7248   |
| O89  | 0.28329  | 0.33525 | 0.34996  | O347 | 0.06925  | 1.07264 | 0.58259  |
| O90  | 0.31683  | 0.30388 | 0.35012  | O348 | 0.02203  | 1.07993 | 0.79249  |
| C91  | 0.67225  | 0.71186 | 0.34436  | H349 | 0.2374   | 0.6824  | 0.06635  |
| O92  | 0.67405  | 0.74567 | 0.38146  | H350 | 0.1721   | 0.68199 | 0.02667  |
| O93  | 0.70448  | 0.7112  | 0.36933  | H351 | 0.0973   | 0.54357 | -0.04055 |
| C94  | 0.39844  | 0.79777 | 0.09125  | H352 | 0.16265  | 0.54377 | 0.00083  |
| C95  | 0.36987  | 0.80467 | 0.36462  | H353 | 0.24532  | 0.60399 | 0.38482  |
| C96  | 0.40854  | 0.81415 | 0.42445  | H354 | 0.17965  | 0.55003 | 0.46574  |
| C97  | 0.44235  | 0.85584 | 0.45636  | H355 | 0.13139  | 0.63016 | 0.42966  |
| C98  | 0.43792  | 0.88856 | 0.43055  | H356 | 0.19768  | 0.68496 | 0.3532   |
| C99  | 0.39879  | 0.87956 | 0.37985  | H357 | 0.0977   | 0.64604 | -0.02052 |
| C100 | 0.36484  | 0.8377  | 0.34799  | H358 | 0.05657  | 0.65207 | -0.03178 |
| C101 | 0.3631   | 0.79662 | 0.04054  | H359 | 0.92233  | 0.58742 | -0.04103 |
| C102 | 0.36655  | 0.8328  | 0.00715  | H360 | -0.02082 | 0.51449 | -0.05031 |
| C103 | 0.40531  | 0.87054 | 0.02278  | H361 | 0.87413  | 0.53758 | -0.06703 |
| C104 | 0.44103  | 0.8717  | 0.06875  | H362 | 0.02932  | 0.72087 | 0.0841   |
| C105 | 0.43752  | 0.83526 | 0.10193  | H363 | 0.67496  | 0.47399 | 0.14283  |
| C106 | 0.11283  | 0.55311 | 0.48485  | H364 | 0.68257  | 0.54424 | 0.1861   |
| N107 | 0.0806   | 0.55525 | 0.48543  | H365 | 0.5522   | 0.48383 | 0.00707  |
| C108 | 0.04184  | 0.52097 | 0.51202  | H366 | 0.54456  | 0.41349 | -0.03817 |
| C109 | 0.03702  | 0.48306 | 0.53589  | H367 | 0.55369  | 0.33867 | 0.25033  |
| C110 | -0.00147 | 0.44874 | 0.55313  | H368 | 0.48487  | 0.3304  | 0.26442  |
| C111 | 0.96447  | 0.45234 | 0.54533  | H369 | 0.55021  | 0.46307 | 0.45726  |
| C112 | 0.96857  | 0.4899  | 0.52083  | H370 | 0.61902  | 0.47115 | 0.44692  |
| C113 | 0.00737  | 0.52403 | 0.50376  | H371 | 0.44365  | 0.35858 | 0.33204  |
| N114 | 0.93302  | 0.49238 | 0.50019  | H372 | 0.65371  | 0.58717 | 0.18801  |
| C115 | 0.89609  | 0.46072 | 0.50693  | H373 | 0.39382  | 0.35083 | 0.36501  |
| C116 | 0.85907  | 0.46156 | 0.47576  | H374 | 0.32693  | 0.41402 | 0.36626  |
| C117 | 0.83553  | 0.47334 | -0.01348 | H375 | 0.46253  | 0.48893 | 0.40523  |
| C118 | 0.83321  | 0.43836 | 0.02924  | H376 | 0.66023  | 0.63616 | 0.25131  |

|      |          |          |          |      |         |         |          |
|------|----------|----------|----------|------|---------|---------|----------|
| C119 | 0.79728  | 0.40768  | 0.07421  | H377 | 0.5986  | 0.70442 | 0.28148  |
| C120 | 0.76372  | 0.41198  | 0.07863  | H378 | 0.529   | 0.57298 | 0.07607  |
| C121 | 0.76572  | 0.4462   | 0.0301   | H379 | 0.33413 | 0.46495 | 0.30054  |
| C122 | 0.80143  | 0.47669  | -0.01501 | H380 | 0.54858 | 0.69821 | 0.26792  |
| C123 | 0.8615   | 0.49718  | 0.43904  | H381 | 0.44953 | 0.60767 | 0.03132  |
| C124 | 0.82525  | 0.4954   | 0.39731  | H382 | 0.38219 | 0.60413 | 0.0002   |
| C125 | 0.78638  | 0.45798  | 0.38999  | H383 | 0.43968 | 0.72201 | 0.29044  |
| C126 | 0.78417  | 0.42277  | 0.4309   | H384 | 0.50709 | 0.72599 | 0.31926  |
| C127 | 0.82032  | 0.4246   | 0.47311  | H385 | 0.42691 | 0.56892 | 0.50624  |
| O128 | 0.7303   | 0.38357  | 0.13947  | H386 | 0.43072 | 0.63746 | 0.53863  |
| O129 | 0.75097  | 0.45666  | 0.33879  | H387 | 0.31449 | 0.57864 | 0.25486  |
| C130 | -0.00654 | 0.40862  | 0.57251  | H388 | 0.30978 | 0.50946 | 0.226    |
| O131 | 0.95934  | 0.3784   | 0.598    | H389 | 0.28427 | 0.27625 | 0.33347  |
| O132 | 0.02307  | 0.40372  | 0.56181  | H390 | 0.72535 | 0.73564 | 0.45818  |
| O133 | 0.65347  | 0.29824  | 0.17737  | H391 | 0.41238 | 0.78768 | 0.44712  |
| O134 | 0.60716  | 0.30564  | 0.39044  | H392 | 0.47375 | 0.86332 | 0.5037   |
| C135 | 0.60336  | 0.26844  | 0.41457  | H393 | 0.39466 | 0.90633 | 0.36462  |
| C136 | 0.62015  | 0.25754  | 0.11772  | H394 | 0.33297 | 0.83054 | 0.30832  |
| C137 | 0.58091  | 0.249    | 0.06999  | H395 | 0.33125 | 0.76593 | 0.02633  |
| C138 | 0.54718  | 0.20765  | 0.02801  | H396 | 0.3376  | 0.83165 | -0.03316 |
| C139 | 0.552    | 0.17414  | 0.03256  | H397 | 0.47285 | 0.90226 | 0.07907  |
| C140 | 0.59137  | 0.18228  | 0.07387  | H398 | 0.46667 | 0.83622 | 0.13778  |
| C141 | 0.62535  | 0.22392  | 0.11524  | H399 | 0.11144 | 0.52418 | 0.51239  |
| C142 | 0.6384   | 0.26701  | 0.44636  | H400 | 0.06473 | 0.48001 | 0.5414   |
| C143 | 0.6338   | 0.22865  | 0.45783  | H401 | 0.93284 | 0.42459 | 0.55889  |
| C144 | 0.59428  | 0.19159  | 0.43947  | H402 | 0.01076 | 0.55446 | 0.483    |
| C145 | 0.55919  | 0.19325  | 0.4144   | H403 | 0.89155 | 0.43078 | 0.53808  |
| C146 | 0.56379  | 0.23166  | 0.40294  | H404 | 0.86058 | 0.4349  | 0.02736  |
| C147 | 0.59091  | 0.15145  | 0.43344  | H405 | 0.79523 | 0.37902 | 0.10746  |
| N148 | 0.55559  | 0.11563  | 0.4199   | H406 | 0.73798 | 0.44918 | 0.02743  |
| C149 | 0.55299  | 0.07658  | 0.40223  | H407 | 0.80272 | 0.50443 | -0.05326 |
| C150 | 0.51448  | 0.1315   | 0.00499  | H408 | 0.89303 | 0.52764 | 0.44318  |
| N151 | 0.51433  | 0.09809  | 0.01994  | H409 | 0.82724 | 0.52453 | 0.36897  |
| C152 | 0.47616  | 0.05743  | 0.00081  | H410 | 0.75272 | 0.39251 | 0.42973  |
| C153 | 0.58612  | 0.07486  | 0.36314  | H411 | 0.81814 | 0.39579 | 0.5055   |
| C154 | 0.58298  | 0.03655  | 0.33919  | H412 | 0.05094 | 0.42874 | 0.63368  |
| C155 | 0.54658  | -0.00022 | 0.35696  | H413 | 0.57646 | 0.27603 | 0.06536  |
| C156 | 0.51322  | 1.00084  | 0.39711  | H414 | 0.51546 | 0.20108 | -0.0103  |
| C157 | 0.51626  | 0.03927  | 0.41659  | H415 | 0.59572 | 0.15506 | 0.07378  |
| C158 | 0.43786  | 0.0534   | -0.02206 | H416 | 0.65738 | 0.23035 | 0.14702  |
| C159 | 0.40058  | 0.01424  | -0.03423 | H417 | 0.6707  | 0.29721 | 0.46285  |
| C160 | 0.40167  | -0.02132 | -0.02361 | H418 | 0.66232 | 0.22749 | 0.48226  |
| C161 | 0.43956  | 0.98188  | -0.00044 | H419 | 0.5269  | 0.16327 | 0.40335  |

|      |          |          |          |      |          |          |          |
|------|----------|----------|----------|------|----------|----------|----------|
| C162 | 0.47677  | 0.02151  | 0.01287  | H420 | 0.53518  | 0.23298  | 0.38407  |
| N163 | 0.47545  | 0.9626   | 0.40941  | H421 | 0.62006  | 0.15086  | 0.44073  |
| C164 | 0.4757   | 0.93015  | 0.43523  | H422 | 0.48328  | 0.12637  | -0.03168 |
| N165 | 0.44047  | 0.94554  | 0.01682  | H423 | 0.61605  | 0.105    | 0.35059  |
| C166 | 0.40654  | 0.90831  | -0.00121 | H424 | 0.5436   | -0.03173 | 0.33884  |
| C167 | 0.61685  | 0.0347   | 0.29034  | H425 | 0.48875  | 0.04016  | 0.44419  |
| O168 | 0.61116  | -0.00062 | 0.24604  | H426 | 0.43693  | 0.0824   | -0.03095 |
| O169 | 0.65178  | 0.06838  | 0.28969  | H427 | 0.37154  | -0.05359 | -0.03375 |
| C170 | 0.36073  | 0.0107   | -0.0529  | H428 | 0.50761  | 0.02443  | 0.0336   |
| O171 | 0.32683  | -0.02505 | -0.06512 | H429 | 0.5064   | 0.93327  | 0.4632   |
| O172 | 0.35987  | 0.04341  | -0.05574 | H430 | 0.3756   | 0.9038   | -0.03756 |
| O173 | 0.39562  | 0.76248  | 0.13277  | H431 | 0.656    | 0.09397  | 0.36605  |
| O174 | 0.3375   | 0.76337  | 0.30776  | H432 | 0.39203  | 0.07178  | -0.03719 |
| P175 | -0.03573 | 0.97039  | 0.72654  | H433 | -0.07767 | 0.9861   | 0.53873  |
| N176 | -0.00612 | 0.96083  | 0.82948  | H434 | -0.14331 | 0.98288  | 0.46528  |
| P177 | 0.0437   | 0.98515  | 0.80411  | H435 | -0.21789 | 0.85086  | 0.52535  |
| N178 | 0.06228  | 1.03691  | 0.81803  | H436 | -0.15231 | 0.85371  | 0.59708  |
| P179 | 0.0367   | 1.04841  | 0.70432  | H437 | -0.06292 | 0.92908  | 0.93983  |
| N180 | -0.00586 | 1.00256  | 0.62237  | H438 | -0.12763 | 0.87399  | 1.0218   |
| O181 | -0.07575 | 0.92176  | 0.62696  | H439 | -0.18535 | 0.94358  | 0.94123  |
| O182 | -0.05532 | 0.99459  | 0.82729  | H440 | -0.12033 | 0.99921  | 0.86015  |
| C183 | -0.08866 | 0.96629  | 0.88873  | H441 | -0.21805 | 0.94738  | 0.43422  |
| C184 | -0.11125 | 0.92051  | 0.57732  | H442 | -0.25797 | 0.95471  | 0.41659  |
| C185 | -0.1091  | 0.95581  | 0.53762  | H443 | 0.61008  | 0.89819  | 0.43599  |
| C186 | -0.14528 | 0.95406  | 0.49672  | H444 | -0.336   | 0.82376  | 0.48686  |
| C187 | -0.184   | 0.91707  | 0.49409  | H445 | 0.56361  | 0.85417  | 0.46165  |
| C188 | -0.18638 | 0.88134  | 0.52951  | H446 | -0.27353 | 1.02964  | 0.45618  |
| C189 | -0.1501  | 0.88306  | 0.56998  | H447 | 0.36098  | 0.79966  | 0.71835  |
| C190 | -0.09062 | 0.93212  | 0.93749  | H448 | 0.36572  | 0.86894  | 0.74761  |
| C191 | -0.12625 | 0.90174  | 0.98325  | H449 | 0.24881  | 0.80971  | 0.46678  |
| C192 | -0.16031 | 0.90515  | 0.98209  | H450 | 0.24478  | 0.74133  | 0.43366  |
| C193 | -0.15802 | 0.94007  | 0.93909  | H451 | 0.2357   | 0.65616  | 0.68224  |
| C194 | -0.12216 | 0.97065  | 0.89349  | H452 | 0.16811  | 0.65198  | 0.65307  |
| C195 | -0.22103 | 0.91798  | 0.46436  | H453 | 0.22535  | 0.77023  | 0.94076  |
| N196 | -0.25795 | 0.88622  | 0.47077  | H454 | 0.29272  | 0.77408  | 0.97247  |
| C197 | -0.29349 | 0.88878  | 0.45167  | H455 | 0.12608  | 0.67989  | 0.70396  |
| C198 | -0.28938 | 0.92652  | 0.4297   | H456 | 0.34131  | 0.91373  | 0.67353  |
| C199 | -0.32341 | 0.93016  | 0.42358  | H457 | 0.0761   | 0.67302  | 0.68864  |
| C200 | 0.63808  | 0.89564  | 0.4399   | H458 | 0.01464  | 0.74146  | 0.71834  |
| C201 | 0.63324  | 0.85755  | 0.46121  | H459 | 0.14534  | 0.80472  | 0.89537  |
| C202 | -0.3323  | 0.85447  | 0.46796  | H460 | 0.34897  | 0.96486  | 0.60909  |
| N203 | 0.59449  | 0.82309  | 0.48717  | H461 | 0.28165  | 1.02762  | 0.61093  |
| C204 | 0.56225  | 0.82519  | 0.48841  | H462 | 0.21294  | 0.88989  | 0.56821  |

|      |          |         |         |      |          |         |         |
|------|----------|---------|---------|------|----------|---------|---------|
| C205 | -0.31837 | 0.97045 | 0.40716 | H463 | 0.02047  | 0.7907  | 0.77993 |
| O206 | 0.65211  | 0.97533 | 0.41984 | H464 | 0.23161  | 1.0203  | 0.64481 |
| O207 | -0.28426 | 1.00088 | 0.38212 | H465 | 0.12575  | 0.91568 | 0.51468 |
| P208 | 0.32116  | 0.71477 | 0.6773  | H466 | 0.05669  | 0.90747 | 0.52354 |
| N209 | 0.30451  | 0.66378 | 0.63164 | H467 | 0.12156  | 1.0393  | 0.72512 |
| P210 | 0.32096  | 0.64495 | 0.74905 | H468 | 0.19048  | 1.04786 | 0.7128  |
| N211 | 0.3609   | 0.68675 | 0.85725 | H469 | 0.12176  | 0.89316 | 0.96575 |
| P212 | 0.39665  | 0.7241  | 0.77787 | H470 | 0.12915  | 0.96352 | 1.0121  |
| N213 | 0.37319  | 0.74256 | 0.68575 | H471 | -0.00053 | 0.90328 | 0.82451 |
| O214 | 0.29909  | 0.72801 | 0.54735 | H472 | -0.00803 | 0.83316 | 0.7801  |
| O215 | 0.3069   | 0.72093 | 0.83665 | H473 | -0.03174 | 0.60482 | 0.56462 |
| C216 | 0.26843  | 0.7162  | 0.82565 | H474 | 0.41572  | 1.06917 | 0.70896 |
| C217 | 0.30237  | 0.76641 | 0.5746  | H475 | 0.09884  | 1.10209 | 0.90674 |
| C218 | 0.33585  | 0.80193 | 0.6613  | H476 | 0.15976  | 1.17703 | 0.9836  |
| C219 | 0.33843  | 0.84015 | 0.6778  | H477 | 0.07969  | 1.22308 | 0.89644 |
| C220 | 0.30757  | 0.84313 | 0.60878 | H478 | 0.01812  | 1.14782 | 0.82192 |
| C221 | 0.27421  | 0.80767 | 0.52281 | H479 | 0.00595  | 1.08105 | 0.50625 |
| C222 | 0.27188  | 0.76975 | 0.5053  | H480 | 0.0145   | 1.1508  | 0.48601 |
| C223 | 0.23358  | 0.68207 | 0.73935 | H481 | 0.14985  | 1.21505 | 0.57079 |
| C224 | 0.19632  | 0.67974 | 0.72317 | H482 | 0.1414   | 1.14529 | 0.59085 |
| C225 | 0.19343  | 0.71132 | 0.79264 | H483 | -0.1988  | 0.84105 | 1.03665 |
| C226 | 0.22779  | 0.74479 | 0.88186 | H484 | -0.24725 | 0.79067 | 1.01141 |
| C227 | 0.26503  | 0.74701 | 0.89874 | H485 | 0.61869  | 0.72682 | 1.00369 |
| C228 | 0.15455  | 0.70903 | 0.76841 | H486 | -0.30419 | 0.86393 | 1.02047 |
| N229 | 0.15156  | 0.73965 | 0.8189  | H487 | 0.57636  | 0.73187 | 0.99232 |
| C230 | 0.11434  | 0.73891 | 0.79464 | H488 | 0.54372  | 0.74802 | 0.54259 |
| C231 | 0.31088  | 0.88349 | 0.6242  | H489 | 0.47728  | 0.6931  | 0.6196  |
| N232 | 0.27946  | 0.88527 | 0.58223 | H490 | 0.42986  | 0.77419 | 0.58918 |
| C233 | 0.28089  | 0.92365 | 0.58984 | H491 | 0.49533  | 0.82814 | 0.50809 |
| C234 | 0.07731  | 0.70297 | 0.72433 | H492 | 0.57801  | 0.83488 | 1.01187 |
| C235 | 0.04162  | 0.70348 | 0.69735 | H493 | 0.51234  | 0.83444 | 0.97103 |
| C236 | 0.04333  | 0.74045 | 0.74058 | H494 | 0.43798  | 0.69593 | 0.90788 |
| C237 | 0.08019  | 0.77653 | 0.81145 | H495 | 0.5032   | 0.6964  | 0.94681 |
| C238 | 0.11545  | 0.77543 | 0.83788 | H496 | -0.26315 | 0.7377  | 1.08973 |
| C239 | 0.31852  | 0.96293 | 0.60316 | H497 | 0.26302  | 0.59046 | 0.52551 |
| C240 | 0.31903  | 1.00003 | 0.6093  | H498 | 0.20188  | 0.5147  | 0.4687  |
| C241 | 0.28157  | 0.99762 | 0.60401 | H499 | 0.28141  | 0.47227 | 0.60869 |
| C242 | 0.24374  | 0.95845 | 0.59022 | H500 | 0.34286  | 0.54818 | 0.66516 |
| C243 | 0.24374  | 0.9217  | 0.5818  | H501 | 0.3439   | 0.61227 | 0.94651 |
| N244 | 0.08314  | 0.81513 | 0.85238 | H502 | 0.33758  | 0.54659 | 1.00621 |
| C245 | 0.05216  | 0.81909 | 0.83    | H503 | 0.20235  | 0.47588 | 0.89339 |
| C246 | 0.05665  | 0.85953 | 0.86757 | H504 | 0.20848  | 0.54187 | 0.83447 |
| N247 | 0.20507  | 0.95508 | 0.58767 | H505 | 0.29857  | 0.47237 | 1.01114 |

|      |         |         |         |      |         |         |         |
|------|---------|---------|---------|------|---------|---------|---------|
| C248 | 0.20231 | 0.98722 | 0.61705 | H506 | 0.16861 | 0.44284 | 0.50955 |
| C249 | 0.16193 | 0.98207 | 0.61552 | H507 | 0.30404 | 0.43163 | 1.00865 |
| C250 | 0.12486 | 0.94344 | 0.56255 | H508 | 0.23777 | 0.29554 | 1.00507 |
| C251 | 0.08672 | 0.93878 | 0.56817 | H509 | 0.16755 | 0.35347 | 0.93831 |
| C252 | 0.08515 | 0.9724  | 0.62838 | H510 | 0.13174 | 0.40933 | 0.6336  |
| C253 | 0.12236 | 1.01136 | 0.67863 | H511 | 0.06056 | 0.2726  | 0.62022 |
| C254 | 0.16049 | 1.0161  | 0.67198 | H512 | 0.18784 | 0.33827 | 0.52926 |
| C255 | 0.09439 | 0.89553 | 0.93288 | H513 | 0.19099 | 1.24967 | 1.00467 |
| C256 | 0.09856 | 0.93439 | 0.95787 | H514 | 0.05578 | 1.22571 | 0.52841 |
| C257 | 0.06533 | 0.93779 | 0.91666 | H515 | 0.34793 | 0.42652 | 1.11543 |
| C258 | 0.02722 | 0.9013  | 0.85495 | H516 | 0.03412 | 0.37358 | 0.73455 |

**Table S3.** Simulated structure of CTP-DABA-COF based on ABC-stacking

| space group <i>P1</i>                                  |          |         |          |      |          |         |          |
|--------------------------------------------------------|----------|---------|----------|------|----------|---------|----------|
| $a = b = 30.3180 \text{ \AA}, c = 11.5320 \text{ \AA}$ |          |         |          |      |          |         |          |
| $\alpha = \beta = 90^\circ$ and $\gamma = 120^\circ$   |          |         |          |      |          |         |          |
| $R_{wp} = 0.76 \%$ and $R_p = 0.49\%$                  |          |         |          |      |          |         |          |
| Atom                                                   | x/a      | y/b     | z/c      | Atom | x/a      | y/b     | z/c      |
| P1                                                     | -0.07088 | 0.66434 | -0.35216 | O388 | -0.65403 | 1.09972 | -0.1056  |
| N2                                                     | -0.03605 | 0.62939 | -0.29332 | O389 | -0.86441 | 1.11041 | -0.13387 |
| P3                                                     | -0.00749 | 0.6585  | -0.26287 | C390 | -0.85791 | 1.11157 | -0.18082 |
| N4                                                     | 0.03873  | 0.71547 | -0.29457 | C391 | -0.63341 | 1.15249 | -0.12862 |
| P5                                                     | -0.0395  | 0.74879 | -0.34333 | C392 | -0.71865 | 1.18686 | -0.12863 |
| N6                                                     | -0.08324 | 0.7246  | -0.37647 | C393 | -0.70115 | 1.24003 | -0.15608 |
| O7                                                     | 0.0213   | 0.65256 | -0.38606 | C394 | -0.60166 | 1.26217 | -0.18759 |
| O8                                                     | -0.1946  | 0.64486 | -0.36258 | C395 | -0.51203 | 1.2273  | -0.18283 |
| C9                                                     | -0.21052 | 0.59644 | -0.35649 | C396 | -0.52647 | 1.17388 | -0.15407 |
| C10                                                    | -0.00164 | 0.65972 | -0.43467 | C397 | -0.76823 | 1.08567 | -0.19143 |
| C11                                                    | -0.07878 | 0.69851 | -0.4692  | C398 | -0.77293 | 1.08132 | -0.23543 |
| C12                                                    | -0.11543 | 0.69991 | -0.51432 | C399 | -0.86388 | 1.10374 | -0.27224 |
| C13                                                    | -0.07724 | 0.66293 | -0.52717 | C400 | -0.94517 | 1.13485 | -0.26433 |
| C14                                                    | 0.00978  | 0.62783 | -0.495   | C401 | -0.94374 | 1.1378  | -0.21917 |
| C15                                                    | 0.04714  | 0.62609 | -0.44981 | C402 | -0.8722  | 1.09307 | -0.31463 |
| C16                                                    | -0.24758 | 0.59172 | -0.39885 | N403 | -0.82074 | 1.05096 | -0.30725 |
| C17                                                    | -0.2448  | 0.54389 | -0.39601 | C404 | -0.81918 | 1.02553 | -0.336   |
| C18                                                    | -0.20818 | 0.49889 | -0.35072 | C405 | -0.59123 | 1.31746 | -0.22395 |
| C19                                                    | -0.18511 | 0.50348 | -0.30687 | N406 | -0.68805 | 1.34452 | -0.2403  |
| C20                                                    | -0.18525 | 0.55125 | -0.30952 | C407 | -0.72034 | 1.36801 | -0.29311 |

|     |          |         |          |      |          |         |          |
|-----|----------|---------|----------|------|----------|---------|----------|
| C21 | -0.1206  | 0.65972 | -0.57125 | C408 | -0.79295 | 0.97259 | -0.31063 |
| N22 | -0.21632 | 0.6839  | -0.5961  | C409 | -0.789   | 0.94524 | -0.33738 |
| C23 | -0.25806 | 0.67574 | -0.63622 | C410 | -0.81128 | 0.9719  | -0.39073 |
| C24 | -0.31283 | 0.71496 | -0.6812  | C411 | -0.83857 | 1.02477 | -0.41724 |
| C25 | -0.33991 | 0.70739 | -0.72281 | C412 | -0.84201 | 1.05083 | -0.38904 |
| C26 | -0.31058 | 0.66006 | 0.2811   | C413 | -0.78887 | 1.41339 | -0.31782 |
| C27 | -0.26943 | 0.61832 | 0.32723  | C414 | -0.82695 | 1.43378 | -0.36915 |
| C28 | -0.24448 | 0.62703 | -0.63189 | C415 | -0.79399 | 1.40846 | -0.3959  |
| N29 | -0.25731 | 0.56941 | 0.33147  | C416 | -0.7275  | 1.36302 | -0.37254 |
| C30 | -0.19884 | 0.53074 | 0.36755  | C417 | -0.69231 | 1.34321 | -0.32123 |
| C31 | -0.4011  | 0.74658 | -0.77095 | N418 | -0.86441 | 1.0524  | -0.47056 |
| O32 | -0.39695 | 0.75032 | 0.18638  | C419 | -0.97033 | 1.07128 | -0.47906 |
| O33 | -0.47303 | 0.77819 | -0.76283 | C420 | -0.98168 | 1.1271  | -0.50651 |
| P34 | -0.35532 | 0.30577 | 0.29173  | N421 | -0.6995  | 1.33939 | -0.40165 |
| N35 | -0.33281 | 0.24649 | 0.31268  | C422 | -0.71643 | 1.29193 | -0.39053 |
| P36 | -0.26635 | 0.21739 | 0.36589  | C423 | -0.71601 | 1.28339 | -0.43433 |
| N37 | -0.26014 | 0.24243 | 0.40128  | C424 | -0.77929 | 1.24251 | -0.43383 |
| P38 | -0.32097 | 0.29578 | 0.38445  | C425 | -0.79296 | 1.23928 | -0.47851 |
| N39 | -0.38133 | 0.32647 | 0.33     | C426 | -0.74134 | 1.27656 | -0.52529 |
| O40 | -0.23658 | 0.33388 | 0.26267  | C427 | -0.66556 | 1.31312 | -0.52436 |
| O41 | -0.4488  | 0.32925 | 0.24562  | C428 | -0.65458 | 1.31696 | -0.48019 |
| C42 | -0.45511 | 0.33177 | 0.19835  | C429 | -1.04915 | 1.15006 | -0.48376 |
| C43 | -0.22443 | 0.38559 | 0.24667  | C430 | -1.05554 | 1.20326 | -0.50519 |
| C44 | -0.14863 | 0.40108 | 0.27353  | C431 | -0.99579 | 1.23637 | -0.55116 |
| C45 | -0.13057 | 0.45321 | 0.25662  | C432 | -0.93497 | 1.21401 | -0.57637 |
| C46 | -0.1899  | 0.49185 | 0.21307  | C433 | -0.92769 | 1.16055 | -0.55417 |
| C47 | -0.27286 | 0.47541 | 0.18924  | O434 | -0.77276 | 1.28179 | -0.57239 |
| C48 | -0.28817 | 0.42362 | 0.20456  | O435 | -0.99072 | 1.28865 | -0.56755 |
| C49 | -0.39637 | 0.29686 | 0.18738  | C436 | -0.76528 | 0.88871 | -0.3106  |
| C50 | -0.40567 | 0.302   | 0.13845  | O437 | -0.78845 | 0.85889 | -0.32572 |
| C51 | -0.47024 | 0.34274 | 0.09837  | O438 | -0.71117 | 0.8703  | -0.26374 |
| C52 | -0.52551 | 0.37783 | 0.11012  | C439 | -0.90432 | 1.47998 | -0.39635 |
| C53 | -0.52056 | 0.37214 | 0.159    | O440 | -0.94038 | 1.50027 | -0.44091 |
| C54 | -0.48647 | 0.35286 | 0.0459   | O441 | -0.93812 | 1.49937 | -0.36591 |
| N55 | -0.43193 | 0.32656 | 0.02807  | C442 | -0.63355 | 1.46618 | -0.68379 |
| C56 | -0.43944 | 0.3441  | -0.02561 | C443 | -0.90207 | 1.518   | -0.64357 |
| C57 | -0.17012 | 0.5467  | 0.19156  | C444 | -0.8922  | 1.54211 | -0.61356 |
| N58 | -0.0621  | 0.56355 | 0.18202  | C445 | -0.91997 | 1.59415 | -0.63451 |
| C59 | -0.04889 | 0.6074  | 0.13266  | C446 | -0.96183 | 1.62423 | -0.68566 |
| C60 | -0.42755 | 0.31041 | -0.04543 | C447 | -0.97154 | 1.59907 | -0.7149  |
| C61 | -0.43008 | 0.329   | -0.09886 | C448 | -0.94203 | 1.54729 | -0.6948  |
| C62 | -0.44626 | 0.38197 | -0.13283 | C449 | -0.56673 | 1.45054 | -0.71332 |
| C63 | -0.45861 | 0.4168  | -0.1147  | C450 | -0.55814 | 1.48216 | -0.76687 |

|      |          |         |          |      |          |         |          |
|------|----------|---------|----------|------|----------|---------|----------|
| C64  | -0.45352 | 0.39691 | -0.06122 | C451 | -0.61669 | 1.53032 | -0.7931  |
| C65  | -0.09728 | 0.65543 | 0.12064  | C452 | -0.6686  | 1.54795 | -0.76183 |
| C66  | -0.09896 | 0.6965  | 0.06968  | C453 | -0.67162 | 1.51785 | -0.7084  |
| C67  | -0.04811 | 0.6894  | 0.03093  | C454 | -1.1282  | 1.36131 | -0.90014 |
| C68  | -0.001   | 0.6416  | 0.04112  | N455 | -1.12686 | 1.39595 | -0.94927 |
| C69  | -0.00093 | 0.60146 | 0.09265  | C456 | -1.13711 | 1.38512 | -0.99015 |
| N70  | -0.46222 | 0.47039 | -0.14971 | C457 | -1.14933 | 1.42557 | -1.04163 |
| C71  | -0.46481 | 0.50549 | -0.13605 | C458 | -1.15437 | 1.41581 | -1.08291 |
| C72  | -0.38732 | 0.54939 | -0.16375 | C459 | -1.1481  | 1.36441 | -0.07187 |
| N73  | 0.03645  | 0.63159 | 0.00164  | C460 | -1.1356  | 1.3231  | -0.02129 |
| C74  | 0.03424  | 0.66565 | -0.04749 | C461 | -1.12935 | 1.33434 | -0.98116 |
| C75  | 0.05301  | 0.651   | -0.08667 | N462 | -1.1239  | 1.27234 | -0.01238 |
| C76  | 0.06778  | 0.60057 | -0.07893 | C463 | -1.14235 | 1.22842 | 0.02983  |
| C77  | 0.07949  | 0.59172 | -0.12044 | C464 | -1.09921 | 1.18153 | 0.03181  |
| C78  | 0.0762   | 0.63305 | -0.17175 | C465 | -0.67983 | 1.07739 | 0.16283  |
| C79  | 0.06848  | 0.68345 | -0.17951 | C466 | -0.6598  | 1.02598 | 0.17512  |
| C80  | 0.05673  | 0.69186 | -0.13814 | C467 | -0.68373 | 1.0091  | 0.14053  |
| C81  | -0.32982 | 0.57111 | -0.13719 | C468 | -0.73317 | 1.04273 | 0.09199  |
| C82  | -0.24576 | 0.60983 | -0.16135 | C469 | -0.76723 | 1.0922  | 0.08171  |
| C83  | -0.21776 | 0.62869 | -0.21364 | C470 | -0.74233 | 1.10877 | 0.11679  |
| C84  | -0.28284 | 0.611   | -0.24171 | C471 | -1.02676 | 1.1841  | -0.00778 |
| C85  | -0.36455 | 0.57157 | -0.21703 | C472 | -0.98512 | 1.14023 | -0.00725 |
| O86  | 0.07398  | 0.62388 | -0.21291 | C473 | -1.01184 | 1.09072 | 0.03402  |
| O87  | -0.12652 | 0.66304 | -0.23608 | C474 | -1.08702 | 1.08703 | 0.07325  |
| C88  | -0.40818 | 0.29491 | -0.1211  | C475 | -1.12857 | 1.13148 | 0.07218  |
| O89  | -0.36414 | 0.30677 | -0.16274 | O476 | -0.74993 | 1.02557 | 0.05739  |
| O90  | -0.443   | 0.24514 | -0.08944 | O477 | -0.96299 | 1.04665 | 0.03766  |
| C91  | -0.15766 | 0.74676 | 0.0543   | O478 | -0.8133  | 0.9186  | -0.01824 |
| O92  | -0.14314 | 0.78781 | 0.0149   | O479 | -0.99251 | 0.97594 | -0.05092 |
| O93  | -0.24062 | 0.74367 | 0.08892  | C480 | -1.0659  | 0.94891 | -0.00879 |
| C94  | 0.05552  | 0.83501 | -0.42915 | C481 | -0.80981 | 0.87961 | -0.03038 |
| C95  | -0.15747 | 0.78228 | -0.28813 | C482 | -0.86852 | 0.88135 | -0.07268 |
| C96  | -0.26347 | 0.78168 | -0.26348 | C483 | -0.85594 | 0.84068 | -0.08304 |
| C97  | -0.26878 | 0.80355 | -0.23189 | C484 | -0.78528 | 0.79659 | -0.05224 |
| C98  | -0.16943 | 0.82687 | -0.22358 | C485 | -0.72948 | 0.79602 | -0.00968 |
| C99  | -0.06236 | 0.82377 | -0.2458  | C486 | -0.74089 | 0.83608 | 0.00068  |
| C100 | -0.05636 | 0.80284 | -0.27796 | C487 | -1.10544 | 0.97199 | 0.01963  |
| C101 | 0.07385  | 0.81625 | -0.46337 | C488 | -1.14027 | 0.94166 | 0.07074  |
| C102 | 0.10092  | 0.85031 | -0.51497 | C489 | -1.14783 | 0.88742 | 0.09379  |
| C103 | 0.10943  | 0.90422 | -0.53492 | C490 | -1.13168 | 0.8664  | 0.06118  |
| C104 | 0.09433  | 0.9219  | -0.49943 | C491 | -1.08862 | 0.89606 | 0.0111   |
| C105 | 0.06823  | 0.88824 | -0.44774 | C492 | -1.16781 | 0.85335 | 0.14866  |
| C106 | -0.19626 | 0.45088 | -0.3513  | N493 | -1.1346  | 0.86944 | 0.18     |

|      |          |         |          |      |          |         |          |
|------|----------|---------|----------|------|----------|---------|----------|
| N107 | -0.13539 | 0.41275 | -0.31531 | C494 | -1.10159 | 0.8371  | 0.232    |
| C108 | -0.09236 | 0.37034 | -0.31905 | C495 | -0.76665 | 0.75343 | -0.06175 |
| C109 | -0.01882 | 0.33309 | -0.28073 | N496 | -0.70845 | 0.71396 | -0.02622 |
| C110 | 0.02765  | 0.29223 | -0.28558 | C497 | -0.67539 | 0.66258 | -0.01054 |
| C111 | -0.00112 | 0.28801 | 0.67112  | C498 | -1.10815 | 0.85445 | 0.26777  |
| C112 | -0.07752 | 0.32333 | 0.63302  | C499 | -1.07338 | 0.82313 | 0.31932  |
| C113 | -0.12    | 0.36427 | -0.3614  | C500 | -1.03145 | 0.7733  | 0.33462  |
| N114 | -0.11656 | 0.31564 | 0.59256  | C501 | -1.02457 | 1.75404 | -0.69977 |
| C115 | -0.18405 | 0.3478  | 0.55482  | C502 | -1.05862 | 0.78724 | 0.24892  |
| C116 | -0.25343 | 0.32923 | 0.52672  | C503 | -0.67352 | 0.63885 | -0.04113 |
| C117 | -0.20619 | 0.4805  | 0.37128  | C504 | -0.63806 | 0.58698 | -0.01992 |
| C118 | -0.13291 | 0.44009 | 0.40645  | C505 | -0.60805 | 0.55889 | 0.03283  |
| C119 | -0.13546 | 0.39147 | 0.41111  | C506 | -0.61128 | 1.5808  | -0.93523 |
| C120 | -0.21517 | 0.38063 | 0.38181  | C507 | -0.64226 | 0.63311 | 0.04134  |
| C121 | -0.29053 | 0.42013 | 0.34728  | N508 | -0.98656 | 1.70275 | -0.68301 |
| C122 | -0.28429 | 0.46914 | 0.34158  | C509 | -0.9955  | 1.67843 | -0.70906 |
| C123 | -0.33855 | 0.36195 | 0.49097  | N510 | -0.58622 | 1.55094 | -0.88153 |
| C124 | -0.39966 | 0.34767 | 0.4598   | C511 | -0.62994 | 1.56336 | -0.84878 |
| C125 | -0.37797 | 0.29952 | 0.46358  | C512 | -1.07996 | 0.84171 | 0.35733  |
| C126 | -0.30186 | 0.26462 | 0.50239  | O513 | -1.0506  | 0.81883 | 0.40273  |
| C127 | -0.24018 | 0.27949 | 0.53297  | O514 | -1.12459 | 0.89061 | 0.33639  |
| O128 | -0.22101 | 0.33137 | 0.38912  | C515 | -0.63034 | 0.55915 | -0.0497  |
| O129 | -0.41932 | 0.28917 | 0.42636  | O516 | -0.60429 | 0.51391 | -0.03271 |
| C130 | 0.10823  | 0.25316 | -0.24566 | O517 | -0.6541  | 0.58805 | -0.10103 |
| O131 | 0.19659  | 0.23454 | 0.74752  | O518 | -0.67838 | 1.43027 | -0.63561 |
| O132 | 0.06939  | 0.2373  | -0.19667 | O519 | -0.86775 | 1.46719 | -0.62279 |
| O133 | -0.13366 | 0.21015 | 0.35194  | C520 | -0.16491 | 0.45718 | -0.13825 |
| O134 | -0.31481 | 0.15877 | 0.39889  | O521 | -0.13033 | 0.50472 | -0.14765 |
| C135 | -0.3097  | 0.12447 | 0.45162  | O522 | -0.19568 | 0.45218 | -0.17451 |
| C136 | -0.08573 | 0.19426 | 0.3196   | H523 | -0.11296 | 0.7279  | -0.46057 |
| C137 | 0.03687  | 0.18884 | 0.31843  | H524 | -0.17792 | 0.7304  | -0.53986 |
| C138 | 0.08659  | 0.1673  | 0.29106  | H525 | 0.0473   | 0.59932 | -0.50432 |
| C139 | 0.01768  | 0.15046 | 0.26306  | H526 | 0.11249  | 0.59679 | -0.42507 |
| C140 | -0.10396 | 0.16148 | 0.25987  | H527 | -0.27263 | 0.62649 | -0.43556 |
| C141 | -0.15514 | 0.18233 | 0.28784  | H528 | -0.26853 | 0.54232 | -0.4311  |
| C142 | -0.27761 | 0.07255 | 0.47046  | H529 | -0.16144 | 0.46911 | -0.26964 |
| C143 | -0.2582  | 0.03952 | 0.52307  | H530 | -0.16203 | 0.55276 | -0.27434 |
| C144 | -0.26701 | 0.05651 | 0.5594   | H531 | -0.06926 | 0.63407 | -0.58068 |
| C145 | -0.31055 | 0.10713 | 0.54035  | H532 | -0.32964 | 0.7526  | -0.68386 |
| C146 | -0.33293 | 0.14009 | 0.48805  | H533 | -0.32485 | 0.65426 | 0.24787  |
| C147 | -0.23062 | 0.02275 | 0.61295  | H534 | -0.21015 | 0.59491 | -0.59541 |
| N148 | -0.21627 | 0.04186 | 0.64355  | H535 | -0.14473 | 0.53333 | 0.39696  |
| C149 | -0.1769  | 0.0162  | 0.69564  | H536 | -0.51553 | 0.80147 | -0.79408 |

|      |          |          |          |      |          |         |          |
|------|----------|----------|----------|------|----------|---------|----------|
| C150 | 0.07582  | 0.12261  | 0.24081  | H537 | -0.10045 | 0.37126 | 0.30745  |
| N151 | 0.01353  | 0.09293  | 0.22952  | H538 | -0.06806 | 0.464   | 0.27789  |
| C152 | 0.05332  | 0.04165  | 0.24821  | H539 | -0.3238  | 0.50367 | 0.15542  |
| C153 | -0.16649 | 0.04355  | 0.72245  | H540 | -0.34699 | 0.41338 | 0.18176  |
| C154 | -0.12968 | 0.01932  | 0.77428  | H541 | -0.34413 | 0.26476 | 0.21753  |
| C155 | -0.09969 | -0.03311 | 0.79937  | H542 | -0.35995 | 0.27352 | 0.13131  |
| C156 | -0.11234 | 0.93799  | -0.22541 | H543 | -0.57503 | 0.41118 | 0.08011  |
| C157 | -0.14989 | -0.03672 | 0.72286  | H544 | -0.56664 | 0.40016 | 0.16679  |
| C158 | 0.06014  | 0.01898  | 0.21685  | H545 | -0.54522 | 0.38586 | 0.02186  |
| C159 | 0.09685  | -0.03251 | 0.23714  | H546 | -0.24659 | 0.57095 | 0.17049  |
| C160 | 0.12581  | -0.06125 | 0.28982  | H547 | -0.4109  | 0.26918 | -0.01776 |
| C161 | 0.11645  | 0.9593   | -0.67718 | H548 | -0.445   | 0.39743 | -0.17509 |
| C162 | 0.08146  | 0.01107  | 0.30077  | H549 | -0.45641 | 0.42419 | -0.04657 |
| N163 | -0.08996 | 0.88456  | -0.19974 | H550 | -0.13677 | 0.65898 | 0.15249  |
| C164 | -0.17774 | 0.85452  | -0.19516 | H551 | -0.05084 | 0.72226 | -0.00908 |
| N165 | 0.13433  | 0.92716  | -0.62334 | H552 | 0.03131  | 0.56303 | 0.10158  |
| C166 | 0.13038  | 0.94194  | -0.58904 | H553 | -0.49618 | 0.49847 | -0.09808 |
| C167 | -0.12538 | 0.04681  | 0.80436  | H554 | 0.01176  | 0.70676 | -0.06267 |
| O168 | -0.07021 | 0.03567  | 0.8433   | H555 | 0.06683  | 0.56681 | -0.03935 |
| O169 | -0.19834 | 0.08894  | 0.78384  | H556 | 0.08853  | 0.55188 | -0.1134  |
| C170 | 0.10408  | -0.05887 | 0.20602  | H557 | 0.07125  | 0.71784 | -0.21841 |
| O171 | 0.13841  | -0.10248 | 0.22002  | H558 | 0.0473   | 0.73244 | -0.14729 |
| O172 | 0.06475  | -0.02947 | 0.15648  | H559 | -0.34679 | 0.5552  | -0.09557 |
| O173 | 0.02432  | 0.80327  | -0.37831 | H560 | -0.1978  | 0.62473 | -0.13926 |
| O174 | -0.15374 | 0.7628   | -0.32133 | H561 | -0.2696  | 0.6278  | -0.28354 |
| P175 | -0.42569 | 0.98021  | -1.00576 | H562 | -0.40906 | 0.55692 | -0.24008 |
| N176 | -0.39687 | 0.93975  | -0.9476  | H563 | -0.48574 | 0.24064 | -0.05961 |
| P177 | -0.43122 | 0.95537  | -0.90627 | H564 | -0.25746 | 0.70854 | 0.11508  |
| N178 | -0.42533 | 1.01391  | -0.92109 | H565 | -0.34361 | 0.76461 | -0.27006 |
| P179 | -0.41833 | 1.05492  | -0.98032 | H566 | -0.3551  | 0.80402 | -0.21512 |
| N180 | -0.44357 | 1.03837  | -1.02167 | H567 | 0.01972  | 0.84017 | -0.24015 |
| O181 | -0.32869 | 0.97677  | -1.04356 | H568 | 0.02937  | 0.80352 | -0.29571 |
| O182 | -0.54408 | 0.96162  | -1.02107 | H569 | 0.06799  | 0.77448 | -0.44994 |
| C183 | -0.53139 | 0.9219   | -1.03166 | H570 | 0.11281  | 0.83378 | -0.54055 |
| C184 | -0.35126 | 0.99429  | -1.09537 | H571 | 0.0998   | 0.96365 | -0.51267 |
| C185 | -0.41221 | 1.04073  | -1.12658 | H572 | 0.05306  | 0.90327 | -0.42112 |
| C186 | -0.44596 | 1.05469  | -1.1766  | H573 | -0.22921 | 0.45219 | -0.38673 |
| C187 | -0.42417 | 1.02272  | -1.19792 | H574 | 0.00504  | 0.33787 | -0.24749 |
| C188 | -0.36128 | 0.97654  | -1.16636 | H575 | 0.03349  | 0.25535 | 0.66759  |
| C189 | -0.32225 | 0.96332  | -1.11699 | H576 | -0.18012 | 0.39215 | -0.39097 |
| C190 | -0.4625  | 0.87807  | -0.99993 | H577 | -0.20246 | 0.38786 | 0.54564  |
| C191 | -0.43894 | 0.84171  | -1.01445 | H578 | -0.07093 | 0.44636 | 0.43132  |
| C192 | -0.48328 | 0.84662  | -1.06069 | H579 | -0.07903 | 0.36049 | 0.44029  |

|      |          |         |          |      |          |          |          |
|------|----------|---------|----------|------|----------|----------|----------|
| C193 | -0.55476 | 0.88997 | -1.09157 | H580 | -0.35129 | 0.41335  | 0.32253  |
| C194 | -0.57891 | 0.9269  | -1.07745 | H581 | -0.34337 | 0.49911  | 0.31293  |
| C195 | -0.46638 | 1.03945 | -1.25002 | H582 | -0.35293 | 0.40134  | 0.48459  |
| N196 | -0.45716 | 1.00888 | -1.26924 | H583 | -0.45697 | 0.37647  | 0.42886  |
| C197 | -0.491   | 1.01991 | -1.31942 | H584 | -0.28778 | 0.22582  | 0.50729  |
| C198 | -0.5331  | 1.06855 | -1.35763 | H585 | -0.17692 | 0.25181  | 0.56148  |
| C199 | -0.56455 | 1.07855 | -1.40722 | H586 | -0.00802 | 0.25055  | -0.19703 |
| C200 | -0.5545  | 1.03869 | -0.41849 | H587 | 0.09556  | 0.20035  | 0.34036  |
| C201 | -0.51477 | 0.98966 | -0.38149 | H588 | 0.18271  | 0.16089  | 0.29444  |
| C202 | -0.48304 | 0.98085 | -1.33232 | H589 | -0.16211 | 0.15122  | 0.23668  |
| N203 | -0.51311 | 0.95026 | -0.39387 | H590 | -0.25119 | 0.18886  | 0.28469  |
| C204 | -0.42879 | 0.91733 | -0.38368 | H591 | -0.26162 | 0.05771  | 0.44375  |
| C205 | -0.60833 | 1.1299  | -1.44782 | H592 | -0.22792 | -0.00021 | 0.53538  |
| O206 | -0.62999 | 1.14474 | -0.49325 | H593 | -0.32397 | 0.12256  | 0.56678  |
| O207 | -0.62658 | 1.16206 | -1.42871 | H594 | -0.3683  | 0.17892  | 0.47583  |
| P208 | -0.6667  | 0.70363 | -0.46944 | H595 | -0.21126 | -0.01792 | 0.62458  |
| N209 | -0.66665 | 0.64275 | -0.44284 | H596 | 0.1715   | 0.11695  | 0.24856  |
| P210 | -0.64381 | 0.61358 | -0.38276 | H597 | -0.18802 | 0.08517  | 0.70095  |
| N211 | -0.60384 | 0.6444  | -0.35581 | H598 | -0.07132 | -0.05279 | 0.84022  |
| P212 | -0.64017 | 0.70262 | -0.38201 | H599 | -0.15887 | -0.05983 | 0.70358  |
| N213 | -0.70178 | 0.72947 | -0.4365  | H600 | 0.03642  | 0.04374  | 0.17583  |
| O214 | -0.5336  | 0.7212  | -0.48886 | H601 | 0.15324  | -0.10207 | 0.30677  |
| O215 | -0.73951 | 0.72982 | -0.5225  | H602 | 0.07067  | 0.02834  | 0.32565  |
| C216 | -0.72776 | 0.72418 | -0.56535 | H603 | -0.26844 | 0.86057  | -0.1856  |
| C217 | -0.47454 | 0.76513 | -0.49706 | H604 | 0.12779  | 0.98292  | -0.59909 |
| C218 | -0.53361 | 0.81032 | -0.50648 | H605 | -0.25254 | 0.08666  | 0.76027  |
| C219 | -0.4719  | 0.85058 | -0.50662 | H606 | 0.05068  | 0.00561  | 0.14791  |
| C220 | -0.34793 | 0.85015 | -0.50078 | H607 | -0.43464 | 1.06695  | -1.11188 |
| C221 | -0.29019 | 0.80572 | -0.49502 | H608 | -0.49412 | 1.09159  | -1.19891 |
| C222 | -0.35144 | 0.76414 | -0.49258 | H609 | -0.34203 | 0.94924  | -1.18018 |
| C223 | -0.68189 | 0.67896 | -0.56235 | H610 | -0.27507 | 0.9264   | -1.09304 |
| C224 | -0.67105 | 0.67497 | -0.6066  | H611 | -0.4234  | 0.87116  | -0.96325 |
| C225 | -0.70251 | 0.71591 | -0.65585 | H612 | -0.38261 | 0.80877  | -0.9883  |
| C226 | -0.74566 | 0.76139 | -0.65821 | H613 | -0.59323 | 0.89558  | -1.12795 |
| C227 | -0.75986 | 0.76537 | -0.61409 | H614 | -0.63295 | 0.96111  | -1.10299 |
| C228 | -0.69336 | 0.71385 | -0.70333 | H615 | -0.50566 | 1.07854  | -1.27131 |
| N229 | -0.66177 | 0.67145 | -0.70274 | H616 | -0.54034 | 1.09988  | -1.34841 |
| C230 | -0.65764 | 0.67172 | -0.75016 | H617 | -0.57819 | 1.04551  | -0.45725 |
| C231 | -0.27724 | 0.89046 | -0.49899 | H618 | -0.45126 | 0.9422   | -1.30311 |
| N232 | -0.31505 | 0.93794 | -0.51736 | H619 | -0.34168 | 0.92005  | -0.36865 |
| C233 | -0.40816 | 0.96024 | -0.55306 | H620 | -0.64767 | 1.19622  | -1.45632 |
| C234 | -0.56527 | 0.64784 | -0.76168 | H621 | -0.63034 | 0.81387  | -0.51129 |
| C235 | -0.54961 | 0.65523 | -0.81162 | H622 | -0.52689 | 0.88213  | -0.50894 |

|      |          |         |          |      |          |         |          |
|------|----------|---------|----------|------|----------|---------|----------|
| C236 | -0.63454 | 0.68376 | -0.8493  | H623 | -0.19346 | 0.80274 | -0.49045 |
| C237 | -0.73352 | 0.70426 | -0.83773 | H624 | -0.30479 | 0.72848 | -0.4844  |
| C238 | -0.74266 | 0.69816 | -0.78832 | H625 | -0.65577 | 0.64547 | -0.52504 |
| C239 | -0.49455 | 0.9915  | -0.5487  | H626 | -0.63629 | 0.63844 | -0.60221 |
| C240 | -0.58988 | 1.01079 | -0.58318 | H627 | -0.77112 | 0.79507 | -0.69576 |
| C241 | -0.599   | 0.99699 | -0.62167 | H628 | -0.79522 | 0.8014  | -0.61731 |
| C242 | -0.51429 | 0.96567 | -0.627   | H629 | -0.71552 | 0.75018 | -0.73926 |
| C243 | -0.41761 | 0.94989 | -0.59371 | H630 | -0.19293 | 0.87736 | -0.47777 |
| N244 | -0.81974 | 0.73309 | -0.87486 | H631 | -0.50205 | 0.62544 | -0.73037 |
| C245 | -0.8517  | 0.7795  | -0.8859  | H632 | -0.62419 | 0.69117 | -0.88916 |
| C246 | -0.77205 | 0.81482 | -0.87996 | H633 | -0.81744 | 0.71645 | -0.78001 |
| N247 | -0.51953 | 0.95272 | -0.66637 | H634 | -0.48644 | 0.9997  | -0.51664 |
| C248 | -0.47333 | 0.91108 | -0.66309 | H635 | -0.67385 | 1.01103 | -0.64891 |
| C249 | -0.43673 | 0.91235 | -0.71044 | H636 | -0.34807 | 0.92669 | -0.59832 |
| C250 | -0.40558 | 0.86777 | -0.71261 | H637 | -0.93481 | 0.79702 | -0.90657 |
| C251 | -0.3759  | 0.87068 | -0.75929 | H638 | -0.44799 | 0.87661 | -0.62607 |
| C252 | -0.37963 | 0.91786 | -0.80632 | H639 | -0.40639 | 0.82945 | -0.67708 |
| C253 | -0.4019  | 0.96289 | -0.80417 | H640 | -0.34928 | 0.83541 | -0.75954 |
| C254 | -0.4279  | 0.95946 | -0.75728 | H641 | -0.39969 | 1.00182 | -0.83862 |
| C255 | -0.82182 | 0.85716 | -0.87829 | H642 | -0.44567 | 0.99602 | -0.75835 |
| C256 | -0.75323 | 0.89602 | -0.87906 | H643 | -0.91826 | 0.86211 | -0.87897 |
| C257 | -0.63013 | 0.89534 | -0.88278 | H644 | -0.79786 | 0.92923 | -0.87986 |
| C258 | -0.5776  | 0.85143 | -0.87987 | H645 | -0.48076 | 0.84868 | -0.88176 |
| C259 | -0.64724 | 0.81222 | -0.87809 | H646 | -0.59918 | 0.78136 | -0.8804  |
| O260 | -0.36428 | 0.91889 | -0.85265 | H647 | -0.45072 | 0.57733 | -0.75527 |
| O261 | -0.56539 | 0.93779 | -0.8908  | H648 | -0.72431 | 1.07527 | -0.53856 |
| C262 | -0.44357 | 0.63523 | -0.82565 | H649 | -0.4097  | 1.11901 | -0.91906 |
| O263 | -0.39531 | 0.65232 | -0.86752 | H650 | -0.47967 | 1.18603 | -0.89993 |
| O264 | -0.39818 | 0.59187 | -0.78455 | H651 | -0.73527 | 1.23731 | -1.02526 |
| C265 | -0.68045 | 1.04524 | -0.57994 | H652 | -0.66465 | 1.17062 | -1.04283 |
| O266 | -0.76383 | 1.06625 | -0.60885 | H653 | -0.21697 | 1.05313 | -1.06036 |
| O267 | -0.66317 | 1.05289 | -0.53905 | H654 | -0.17499 | 1.11356 | -1.14989 |
| C268 | -0.24926 | 1.11237 | -1.03904 | H655 | -0.21348 | 1.24161 | -1.12048 |
| C269 | -0.53237 | 1.14086 | -0.98277 | H656 | -0.26598 | 1.18025 | -1.03054 |
| C270 | -0.47995 | 1.14605 | -0.943   | H657 | -0.50195 | 0.81321 | -1.11061 |
| C271 | -0.52062 | 1.18387 | -0.93238 | H658 | -0.30721 | 0.68089 | -0.97126 |
| C272 | -0.61364 | 1.21784 | -0.96065 | H659 | -0.35372 | 0.59603 | -0.05313 |
| C273 | -0.66172 | 1.21265 | -1.00145 | H660 | -0.44607 | 0.75721 | -1.12532 |
| C274 | -0.62211 | 1.17523 | -1.01221 | H661 | -0.5873  | 0.73221 | -0.15239 |
| C275 | -0.21727 | 1.09469 | -1.07297 | H662 | -0.64349 | 0.88569 | -0.40372 |
| C276 | -0.1924  | 1.12964 | -1.12438 | H663 | -0.68313 | 0.80656 | -0.40463 |
| C277 | -0.19737 | 1.18348 | -1.14411 | H664 | -0.31349 | 0.76444 | -0.37585 |
| C278 | -0.21384 | 1.20008 | -1.10795 | H665 | -0.2719  | 0.84575 | -0.37551 |

|      |          |         |          |      |          |         |          |
|------|----------|---------|----------|------|----------|---------|----------|
| C279 | -0.24306 | 1.16558 | -1.05681 | H666 | -0.71114 | 0.76924 | -0.22845 |
| C280 | -0.45794 | 0.80823 | -1.0754  | H667 | -0.78488 | 0.7714  | -0.30666 |
| N281 | -0.39407 | 0.76839 | -1.04437 | H668 | -0.55604 | 0.64269 | -0.27679 |
| C282 | -0.3779  | 0.72364 | -1.04775 | H669 | -0.48164 | 0.64133 | -0.2006  |
| C283 | -0.33296 | 0.6785  | -1.00558 | H670 | -0.32168 | 0.61385 | -0.92056 |
| C284 | -0.32125 | 0.63267 | -1.00731 | H671 | -0.61294 | 0.56389 | -0.4527  |
| C285 | -0.35846 | 0.63225 | -0.05183 | H672 | -0.57182 | 0.49064 | -0.46603 |
| C286 | -0.40732 | 0.67634 | -0.09399 | H673 | -0.4231  | 0.40607 | -0.31049 |
| C287 | -0.4115  | 0.72196 | -1.09181 | H674 | -0.45994 | 0.47935 | -0.29889 |
| N288 | -0.45644 | 0.67496 | -0.13649 | H675 | -0.61573 | 0.56556 | -0.27358 |
| C289 | -0.5441  | 0.7051  | -0.16234 | H676 | -0.66892 | 0.51678 | -0.18348 |
| C290 | -0.58915 | 0.70488 | -0.20753 | H677 | -1.00927 | 0.48077 | -0.22391 |
| C291 | -0.45442 | 0.87171 | -0.38734 | H678 | -0.96307 | 0.53728 | -0.31542 |
| C292 | -0.56838 | 0.85965 | -0.39707 | H679 | -0.93117 | 0.42707 | -0.13157 |
| C293 | -0.59201 | 0.81414 | -0.3972  | H680 | -0.48535 | 0.39922 | -0.43379 |
| C294 | -0.5007  | 0.77881 | -0.38804 | H681 | -0.83768 | 0.48023 | -0.02496 |
| C295 | -0.38572 | 0.79136 | -0.38102 | H682 | -0.76511 | 0.32052 | 0.09006  |
| C296 | -0.36342 | 0.83704 | -0.38095 | H683 | -0.77398 | 0.36757 | -0.07193 |
| C297 | -0.67619 | 0.74068 | -0.2382  | H684 | -0.4619  | 0.30367 | -0.40556 |
| C298 | -0.71932 | 0.74199 | -0.28229 | H685 | -0.27102 | 0.16786 | -0.29198 |
| C299 | -0.67811 | 0.70742 | -0.29766 | H686 | -0.30286 | 0.30233 | -0.2749  |
| C300 | -0.592   | 0.6711  | -0.26714 | H687 | -0.61879 | 1.25965 | -0.91698 |
| C301 | -0.54945 | 0.6702  | -0.22318 | H688 | -0.19461 | 1.26223 | -1.20922 |
| O302 | -0.52056 | 0.7324  | -0.3858  | H689 | -0.85811 | 0.46634 | 0.09429  |
| O303 | -0.71938 | 0.7119  | -0.3431  | H690 | -0.51033 | 0.25583 | -0.41917 |
| C304 | -0.27249 | 0.58461 | -0.96313 | H691 | -0.75461 | 1.35695 | -0.78448 |
| O305 | -0.23164 | 0.54699 | 0.03694  | H692 | -0.70785 | 1.27562 | -0.78041 |
| O306 | -0.27903 | 0.58462 | -0.91755 | H693 | -0.56581 | 1.2159  | -0.62498 |
| O307 | -0.55376 | 0.56705 | -0.36581 | H694 | -0.61313 | 1.29896 | -0.63022 |
| O308 | -0.76223 | 0.58378 | -0.35456 | H695 | -0.95821 | 1.31003 | -0.7404  |
| C309 | -0.78608 | 0.55495 | -0.30232 | H696 | -1.05172 | 1.2925  | -0.80405 |
| C310 | -0.53726 | 0.52693 | -0.37504 | H697 | -1.09421 | 1.45793 | -0.90924 |
| C311 | -0.57068 | 0.52891 | -0.42137 | H698 | -0.99808 | 1.47497 | -0.84521 |
| C312 | -0.54682 | 0.48722 | -0.4287  | H699 | -0.61859 | 1.19834 | -0.74461 |
| C313 | -0.49226 | 0.44172 | -0.39009 | H700 | -0.32611 | 1.10542 | -0.63695 |
| C314 | -0.46507 | 0.44017 | -0.3431  | H701 | -0.33626 | 1.03327 | 0.26859  |
| C315 | -0.48552 | 0.4817  | -0.33577 | H702 | -0.62513 | 1.12755 | -0.73445 |
| C316 | -0.70459 | 0.54841 | -0.264   | H703 | -0.67458 | 1.13249 | 0.19164  |
| C317 | -0.73465 | 0.51969 | -0.212   | H704 | -0.16007 | 1.09245 | -0.64648 |
| C318 | -0.84269 | 0.4932  | -0.19527 | H705 | -0.80349 | 1.17321 | -0.10829 |
| C319 | -0.9224  | 0.4997  | -0.23413 | H706 | -0.77288 | 1.26491 | -0.15595 |
| C320 | -0.8962  | 0.53092 | -0.2862  | H707 | -0.42884 | 1.24221 | -0.20408 |
| C321 | -0.87213 | 0.4601  | -0.14109 | H708 | -0.45437 | 1.14876 | -0.15334 |

|      |          |         |          |      |          |         |          |
|------|----------|---------|----------|------|----------|---------|----------|
| N322 | -0.81846 | 0.46683 | -0.10645 | H709 | -0.6947  | 1.06597 | -0.16449 |
| C323 | -0.81026 | 0.42813 | -0.0542  | H710 | -0.70409 | 1.05747 | -0.23943 |
| C324 | -0.4647  | 0.39786 | -0.39693 | H711 | -1.01754 | 1.15441 | -0.29203 |
| N325 | -0.41883 | 0.35826 | -0.35704 | H712 | -1.01381 | 1.15884 | -0.21181 |
| C326 | -0.38381 | 0.30788 | -0.3424  | H713 | -0.92827 | 1.11777 | -0.34843 |
| C327 | -0.82043 | 0.43975 | -0.01434 | H714 | -0.5091  | 1.32859 | -0.24694 |
| C328 | -0.80553 | 0.40164 | 0.03757  | H715 | -0.77844 | 0.95335 | -0.26848 |
| C329 | -0.77956 | 0.35091 | 0.04945  | H716 | -0.80738 | 0.95132 | -0.4128  |
| C330 | -0.76828 | 1.33816 | -0.98966 | H717 | -0.86239 | 1.09252 | -0.40932 |
| C331 | -0.78543 | 0.37707 | -0.0409  | H718 | -0.81347 | 1.43245 | -0.29559 |
| C332 | -0.41078 | 0.28214 | -0.36963 | H719 | -0.82251 | 1.42388 | -0.43638 |
| C333 | -0.37144 | 0.23143 | -0.35163 | H720 | -0.64192 | 1.30674 | -0.30245 |
| C334 | -0.30299 | 0.20759 | -0.30658 | H721 | -1.04317 | 1.05103 | -0.45189 |
| C335 | -0.27637 | 1.23192 | -1.27809 | H722 | -0.74832 | 1.26093 | -0.35252 |
| C336 | -0.31925 | 0.282   | -0.29662 | H723 | -0.82648 | 1.21421 | -0.3985  |
| N337 | -0.73533 | 1.2892  | -0.98118 | H724 | -0.84699 | 1.20783 | -0.47697 |
| C338 | -0.65973 | 1.25624 | -0.94877 | H725 | -0.62383 | 1.34215 | -0.5608  |
| N339 | -0.21525 | 1.20483 | -1.23093 | H726 | -0.60224 | 1.3496  | -0.4833  |
| C340 | -0.19124 | 1.22114 | -1.19888 | H727 | -1.09256 | 1.12581 | -0.44608 |
| C341 | -0.81331 | 0.41388 | 0.07991  | H728 | -1.10045 | 1.21946 | -0.48386 |
| O342 | -0.79389 | 0.38508 | 0.12584  | H729 | -0.88868 | 1.23811 | -0.61336 |
| O343 | -0.84529 | 0.46376 | 0.06361  | H730 | -0.87507 | 1.14455 | -0.57401 |
| C344 | -0.3984  | 0.20152 | -0.37794 | H731 | -0.69106 | 0.89792 | -0.25745 |
| O345 | -0.35634 | 0.16033 | -0.36898 | H732 | -0.99635 | 1.52626 | -0.38381 |
| O346 | -0.48112 | 0.22402 | -0.41571 | H733 | -0.86037 | 1.51982 | -0.5732  |
| O347 | -0.28817 | 1.07887 | -0.98973 | H734 | -0.9087  | 1.61162 | -0.60974 |
| O348 | -0.50122 | 1.1032  | -0.99401 | H735 | -1.00405 | 1.62035 | -0.75514 |
| P349 | -0.85074 | 1.38944 | -0.70108 | H736 | -0.95134 | 1.52925 | -0.71916 |
| N350 | -0.89113 | 1.33427 | -0.65726 | H737 | -0.53126 | 1.41076 | -0.69509 |
| P351 | -0.87954 | 1.32253 | -0.59985 | H738 | -0.51333 | 1.46631 | -0.78876 |
| N352 | -0.85546 | 1.36843 | -0.58904 | H739 | -0.71647 | 1.58509 | -0.77929 |
| P353 | -0.82106 | 1.42345 | -0.63476 | H740 | -0.71371 | 1.53374 | -0.6861  |
| N354 | -0.8527  | 1.43671 | -0.69141 | H741 | -1.15141 | 1.32028 | -0.88502 |
| O355 | -0.71709 | 1.37965 | -0.71067 | H742 | -1.15563 | 1.46528 | -1.04815 |
| O356 | -0.91409 | 1.40509 | -0.75486 | H743 | -1.15139 | 1.35584 | -0.10385 |
| C357 | -0.96682 | 1.39391 | -0.78962 | H744 | -1.11564 | 1.30195 | -0.9416  |
| C358 | -0.688   | 1.33356 | -0.70767 | H745 | -1.18334 | 1.22506 | 0.065    |
| C359 | -0.71548 | 1.3255  | -0.74878 | H746 | -0.6221  | 0.99762 | 0.21275  |
| C360 | -0.68818 | 1.279   | -0.74596 | H747 | -0.66436 | 0.96846 | 0.15256  |
| C361 | -0.63022 | 1.23903 | -0.70266 | H748 | -0.8054  | 1.12005 | 0.04402  |
| C362 | -0.6091  | 1.24641 | -0.66024 | H749 | -0.76586 | 1.14885 | 0.10586  |
| C363 | -0.63594 | 1.29315 | -0.66289 | H750 | -1.00126 | 1.22171 | -0.04122 |
| C364 | -0.98603 | 1.34278 | -0.7781  | H751 | -0.9317  | 1.14603 | -0.0405  |

|      |          |         |          |      |          |         |          |
|------|----------|---------|----------|------|----------|---------|----------|
| C365 | -1.04059 | 1.33328 | -0.81422 | H752 | -1.11389 | 1.04858 | 0.10503  |
| C366 | -1.07784 | 1.37372 | -0.86291 | H753 | -1.18652 | 1.12672 | 0.104    |
| C367 | -1.06275 | 1.42473 | -0.87261 | H754 | -0.92358 | 0.91526 | -0.09794 |
| C368 | -1.00721 | 1.43476 | -0.83709 | H755 | -0.90349 | 0.84383 | -0.11678 |
| C369 | -0.59465 | 1.1949  | -0.70712 | H756 | -0.67078 | 0.76411 | 0.01646  |
| N370 | -0.52737 | 1.1584  | -0.67283 | H757 | -0.68949 | 0.83515 | 0.03234  |
| C371 | -0.47814 | 1.12285 | -0.68579 | H758 | -1.09615 | 1.01403 | 0.00328  |
| C372 | -0.36945 | 1.09827 | -0.66567 | H759 | -1.15578 | 0.96079 | 0.09368  |
| C373 | -0.3179  | 1.06551 | -0.68114 | H760 | -1.14101 | 0.82446 | 0.07693  |
| C374 | -0.37677 | 1.05835 | 0.28167  | H761 | -1.06508 | 0.87725 | -0.01147 |
| C375 | -0.48716 | 1.08081 | 0.26191  | H762 | -1.19025 | 0.81265 | 0.16143  |
| C376 | -0.53671 | 1.11166 | -0.7203  | H763 | -0.80712 | 0.7545  | -0.09594 |
| N377 | -0.54888 | 1.07151 | 0.22655  | H764 | -1.1411  | 0.89402 | 0.254    |
| C378 | -0.63669 | 1.09639 | 0.19604  | H765 | -1.00309 | 0.748   | 0.37505  |
| C379 | -0.20606 | 1.0364  | -0.65835 | H766 | -1.05082 | 0.77435 | 0.22038  |
| O380 | -0.17285 | 0.997   | 0.34302  | H767 | -0.70112 | 0.66236 | -0.0818  |
| O381 | -0.13556 | 1.05806 | -0.63728 | H768 | -0.58235 | 0.51777 | 0.05048  |
| P382 | -0.78168 | 1.07375 | -0.08529 | H769 | -0.64379 | 0.6525  | 0.06447  |
| N383 | -0.78786 | 1.01825 | -0.07964 | H770 | -1.032   | 1.69618 | -0.74861 |
| P384 | -0.85827 | 0.97515 | -0.03217 | H771 | -0.6867  | 1.59757 | -0.86072 |
| N385 | -0.86325 | 0.97898 | 0.01863  | H772 | -1.1247  | 0.9014  | 0.3621   |
| P386 | -0.84744 | 1.03269 | 0.01553  | H773 | -0.67268 | 0.62358 | -0.1126  |
| N387 | -0.81521 | 1.0812  | -0.03809 | H774 | -0.10345 | 0.5045  | -0.11713 |

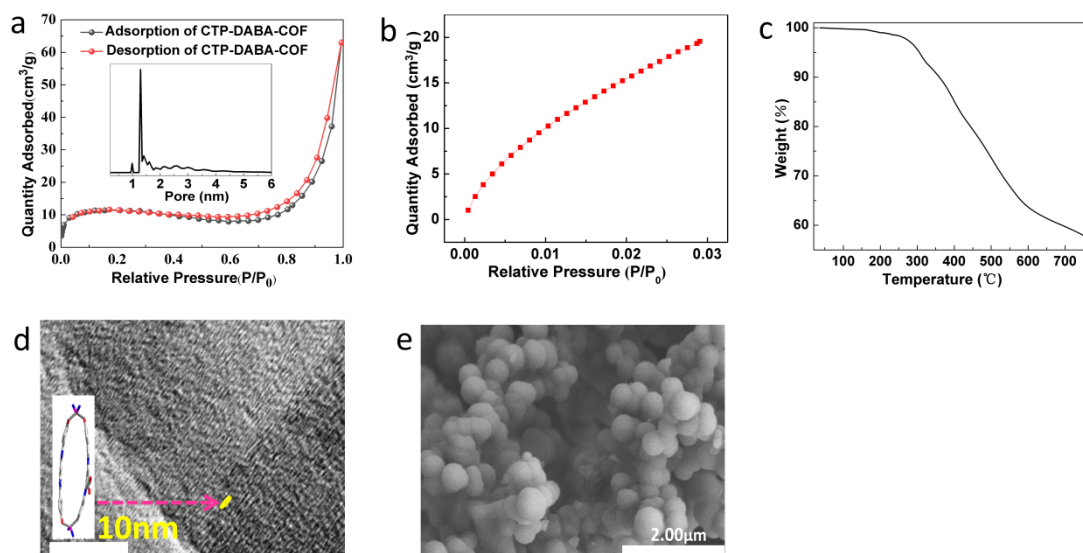

**Fig. S4** (a) N<sub>2</sub> adsorption-desorption isotherms at 77 K, the pore width distributions (inset), (b) CO<sub>2</sub> adsorption isotherms at 298 K, (c) TGA trace, (d) The lattice exhibits a wavy alignment as observed by transmission electron microscopy (TEM) and (e)

SEM image of CTP-DABA-COF.

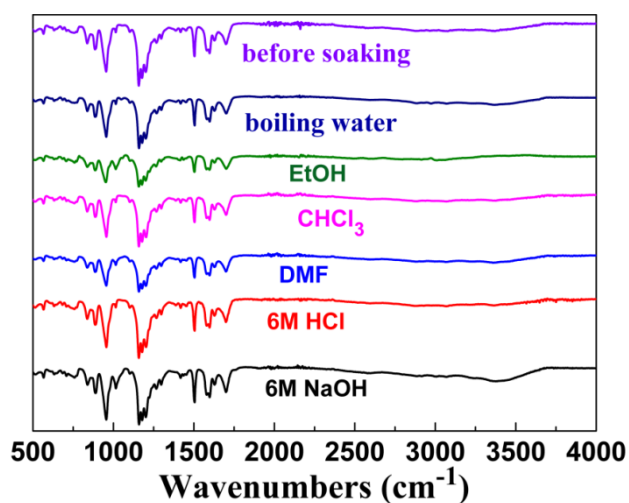

**Fig. S5** CTP-DABA-COF was treated in different solvents for 3 days.

**Table S4.** Optimization of the one-pot tandem deacetalization-Knoevenagel condensation conditions. <sup>a</sup>

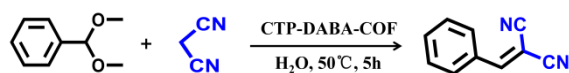

| Entry | Catalyst     | Solvent           | Time | Temperature | Yield <sup>b</sup> |
|-------|--------------|-------------------|------|-------------|--------------------|
| 1     | 1.0 mol%     | solvent-free      | 5h   | 50°C        | 96%                |
| 2     | 1.0 mol%     | THF               | 5h   | 50°C        | 20%                |
| 3     | 1.0 mol%     | 1,4-dioxane       | 5h   | 50°C        | 35%                |
| 4     | 1.0 mol%     | MeOH              | 5h   | 50°C        | 40%                |
| 5     | 1.0 mol%     | EtOH              | 5h   | 50°C        | 80%                |
| 6     | 1.0 mol%     | MeCN              | 5h   | 50°C        | 10%                |
| 7     | 1.0 mol%     | CHCl <sub>3</sub> | 5h   | 50°C        | 55%                |
| 8     | 1.0 mol%     | H <sub>2</sub> O  | 5h   | 50°C        | 99%                |
| 9     | 1.0 mol%     | H <sub>2</sub> O  | 5h   | rt          | 1%                 |
| 10    | 1.0 mol%     | H <sub>2</sub> O  | 5h   | 40°C        | 42%                |
| 11    | 1.0 mol%     | H <sub>2</sub> O  | 4h   | 50°C        | 90%                |
| 12    | 0.5 mol%     | H <sub>2</sub> O  | 5h   | 50°C        | 46%                |
| 13    | No Catalysis | H <sub>2</sub> O  | 5h   | 50°C        | 1%                 |

<sup>a</sup> Reaction conditions: benzaldehyde dimethylacetal (150 $\mu$ L, 1.0 mmol) and malononitrile (66 mg, 1.0 mmol) in the presence of CTP-DABA-COF (11.9 mg, 1 mol %), the mixture was stirred for 5h at different solvent (2 mL).

<sup>b</sup> Yield was determined by GC analysis.

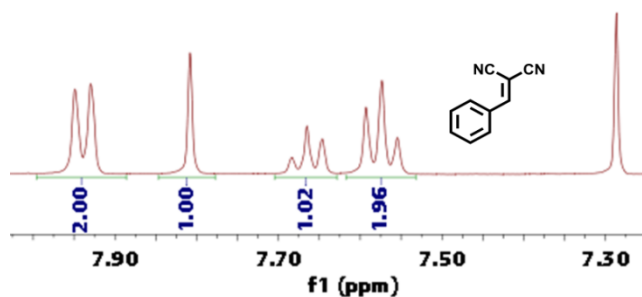

**Fig. S6** <sup>1</sup>H NMR spectra of catalytic product benzylidenemalononitrile in CDCl<sub>3</sub>.

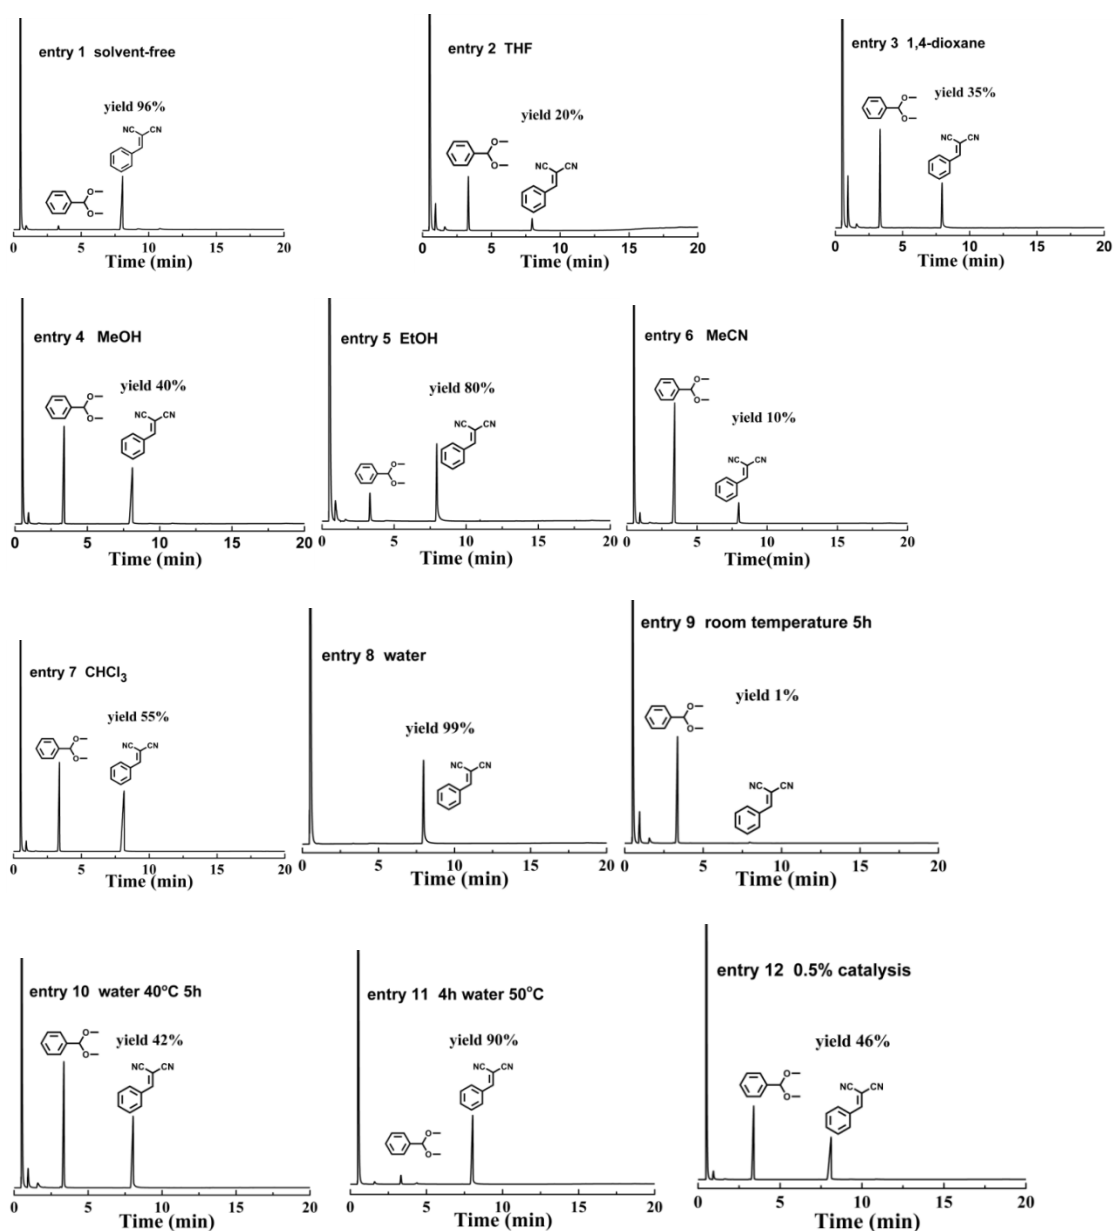

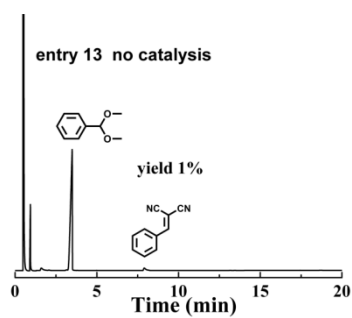

**Fig. S7** The GC of the deacetalization-Knoevenagel condensation.

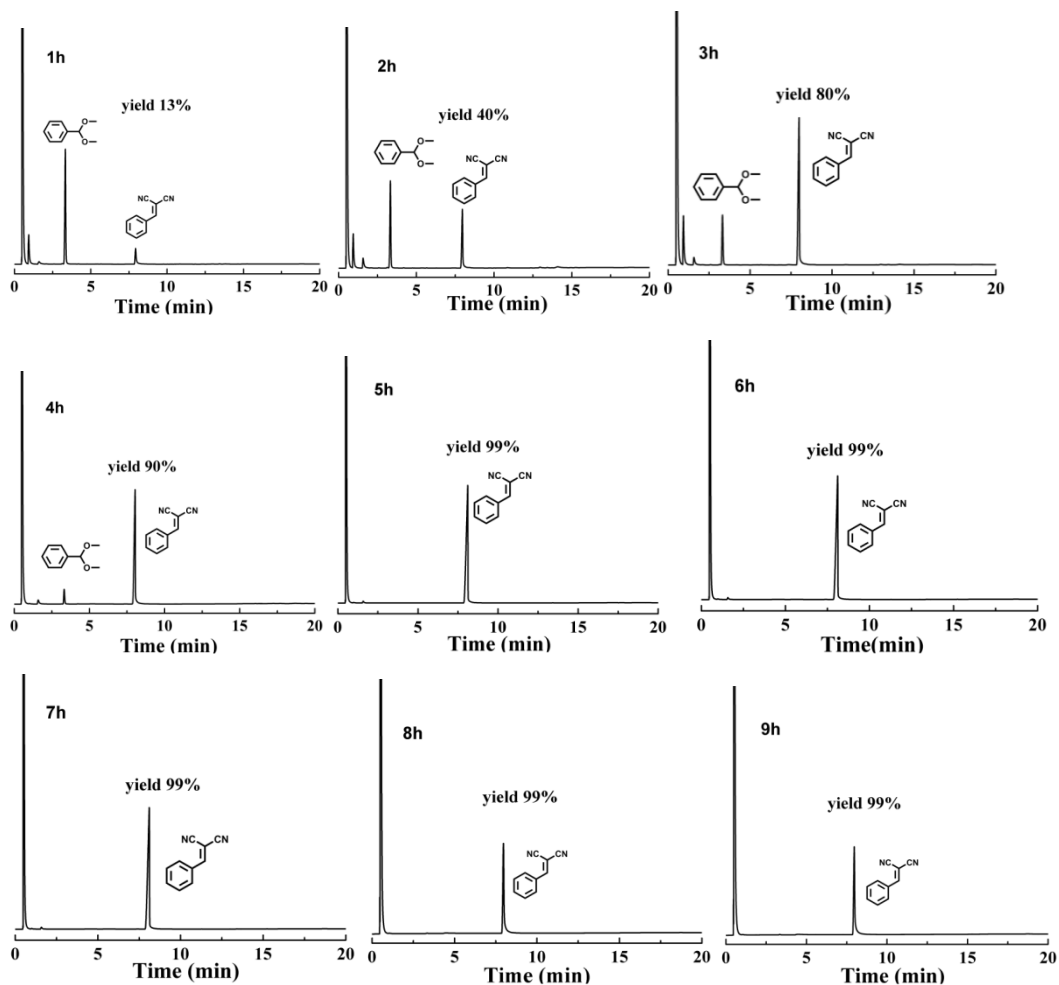

**Fig. S8** The GC of relationship between catalytic yield and time.

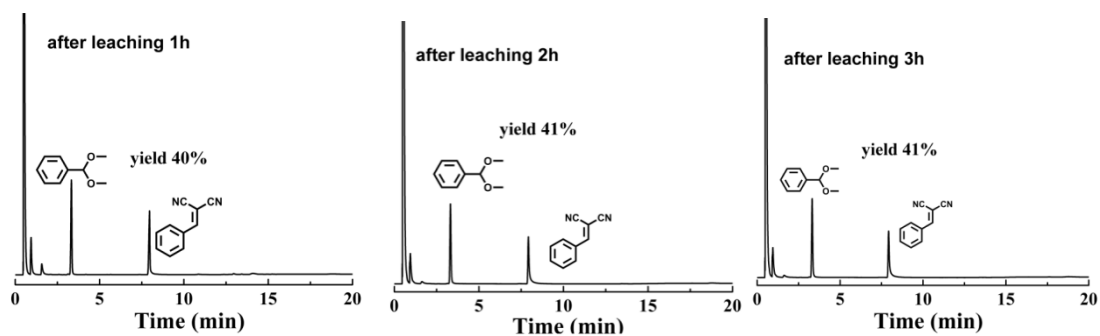

**Fig. S9** The GC of CTP-DABA-COF leaching test.

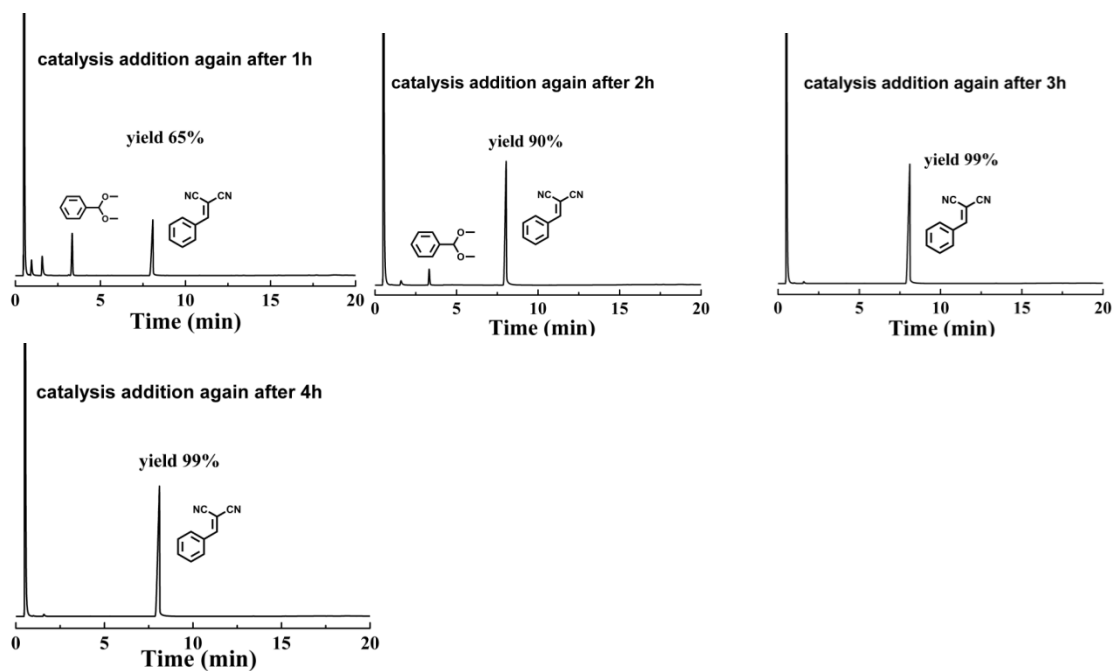

**Fig. S10** The GC of CTP-DABA-COF addition again.

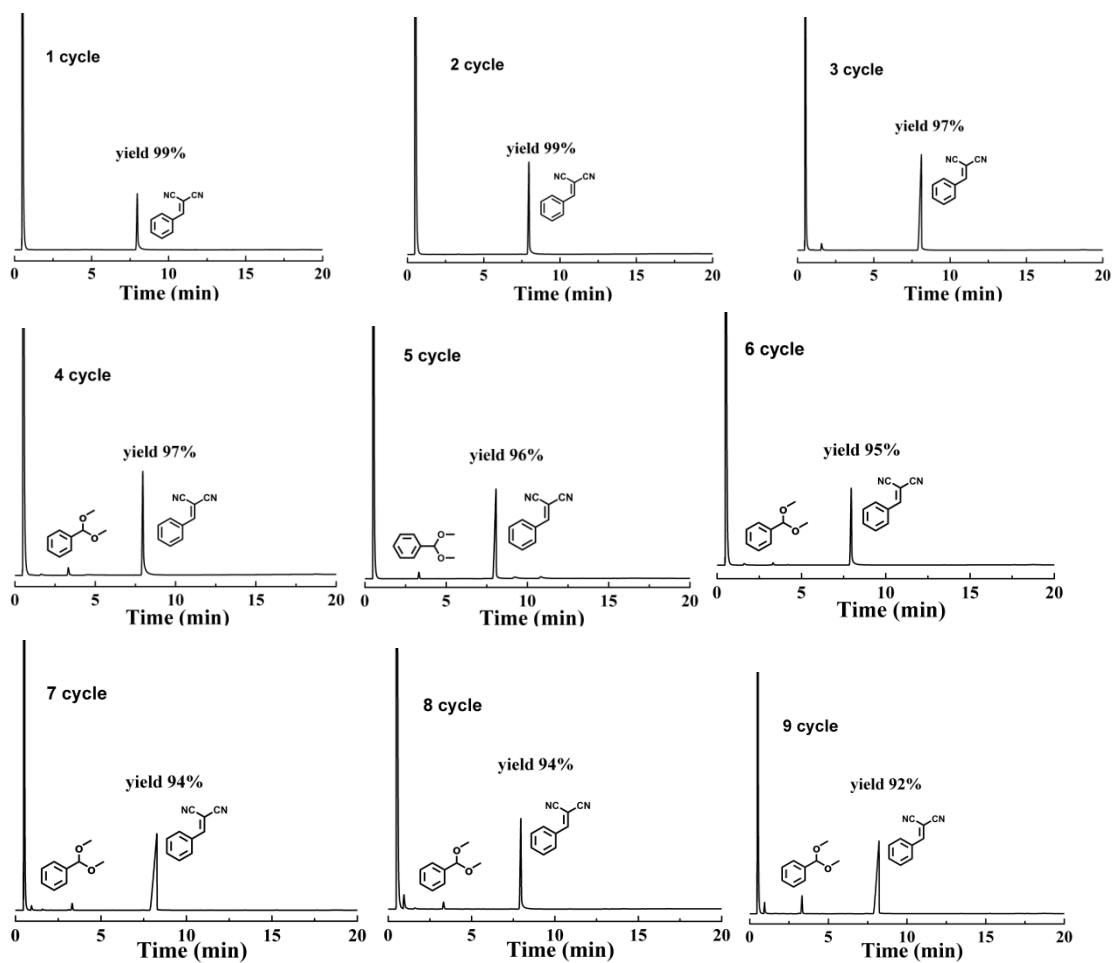

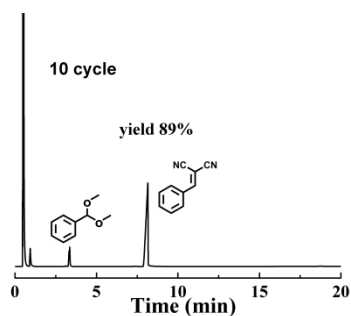

**Fig. S11** The GC of CTP-DABA-COF recycling catalytic test.

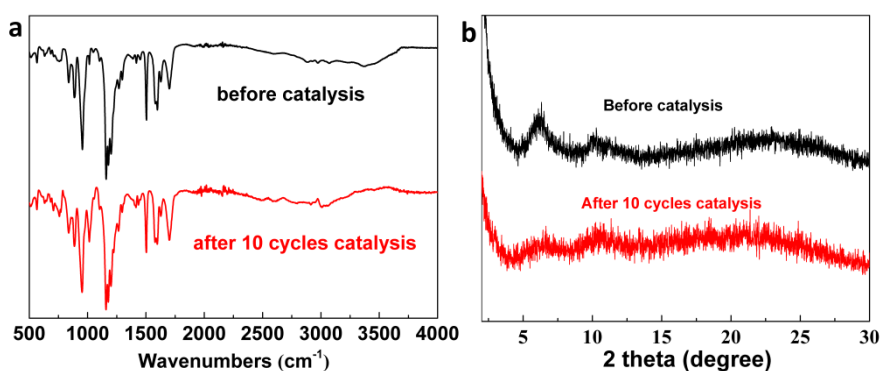

**Fig. S12** The FT-IR and PXRD of CTP-DABA-COF after using ten runs.

**Table S5.** Comparison of CTP-DABA-COF with the reported catalysts for one-pot cascade deacetalization–Knoevenagel condensation.

| Catalyst                                                                                       | Conditions                          | Recycle | Yield | Ref. |
|------------------------------------------------------------------------------------------------|-------------------------------------|---------|-------|------|
| MCM-41-P1                                                                                      | MeCN, toluene / 80 °C / 5h          | 3       | 90    | 1    |
| HisAA-220                                                                                      | MeCN / 80 °C / 4h                   | 5       | 77    | 2    |
| MIL-101(Cr)@CS                                                                                 | MeCN / 80 °C / 12 h                 | 5       | 99    | 3    |
| Pd@N-ZDC@PTA-mSiO <sub>2</sub>                                                                 | DMF / 80 °C / 24 h                  | 5       | >99   | 4    |
| [Zn <sub>2</sub> (L) <sub>2</sub> (H <sub>2</sub> O) <sub>4</sub> ]·2(H <sub>2</sub> O)·6(DMF) | DMF / 80 °C / 3h                    | 5       | 93.5  | 5    |
| PCN-905-SO <sub>2</sub>                                                                        | Toluene / 90 °C / 1 h.              | 1       | 95.5  | 6    |
| Zr <sub>12</sub> BDC-NH <sub>2</sub>                                                           | CDCl <sub>3</sub> / 55 °C / 24 h.   | 3       | 91.8  | 7    |
| PCN-222-Co@TpPa-1                                                                              | DMSO-d <sub>6</sub> / 50 °C / 10 h. | 5       | 99.3  | 8    |

|                                                                                      |                                        |    |      |           |
|--------------------------------------------------------------------------------------|----------------------------------------|----|------|-----------|
| Yb-BDC-NH <sub>2</sub>                                                               | DMSO-d <sub>6</sub> / 50 °C / 24 h     | 4  | 97   | <b>9</b>  |
| [Zn <sub>24</sub> (BDPO) <sub>12</sub> (DMF) <sub>12</sub> ]·6DMF·52H <sub>2</sub> O | Toluene / 90 °C / 3 h                  | 5  | 99   | <b>10</b> |
| BNP-2.1                                                                              | Toluene / 80 °C / 24 h                 | 4  | 98.5 | <b>11</b> |
| 3D DL-COF-1                                                                          | CDCl <sub>3</sub> / r t / 20 h         | 3  | 98   | <b>12</b> |
| MIL-101-AB-0.32                                                                      | DMF, 1,2,4-trichlorobenzene/ 363 K     | 3  | 99   | <b>13</b> |
| Pickering Emulsion Droplets                                                          | Water, toluene / 60 °C / 19 h          | 4  | 75   | <b>14</b> |
| 2,3-DhaTph                                                                           | Toluene / 80 °C / 1 h                  | 5  | 96   | <b>15</b> |
| PPAF-SO <sub>3</sub> H-NH <sub>2</sub>                                               | Toluene / 90 °C / 1 h                  | 7  | 87   | <b>16</b> |
| LZSM-5-AT-OH <sup>-</sup>                                                            | MeCN / 353 K / 15 h                    | 10 | 91.2 | <b>17</b> |
| PPAF-SO <sub>3</sub> H-NH <sub>2</sub>                                               | Toluene / 90 °C / 1 h                  | 8  | 100  | <b>18</b> |
| SAB                                                                                  | Ethyl acetate / 50 °C / 12 h           | 4  | 99   | <b>19</b> |
| Ti <sup>4+</sup> -mont/HT                                                            | Toluene / 80 °C / 1 h                  | 0  | 93   | <b>20</b> |
| TAPB-DMTP-PA-COF                                                                     | Solvent-free, 75 °C, 5h                | 15 | 99   | <b>21</b> |
| [NaZn(btc)(H <sub>2</sub> O) <sub>3</sub> ].1.5H <sub>2</sub> O                      | DMF / 80 °C / 1 h                      | 2  | 99   | <b>22</b> |
| MIL-101(Cr)@MOF-867                                                                  | DMSO/ 353 K / 12 h                     | 5  | 99.9 | <b>23</b> |
| L-TPS/AP/SBA-15                                                                      | H <sub>2</sub> O/toluene 100 °C / 3 h  | 1  | 100  | <b>24</b> |
| CP 1                                                                                 | DMF / 80 °C / 2 h                      | 6  | 99   | <b>25</b> |
| ZIF-8                                                                                | H <sub>2</sub> O/toluene / 353 K / 6 h | 5  | 95   | <b>26</b> |
| UiO-66-NH <sub>2</sub>                                                               | H <sub>2</sub> O/toluene / 353 K / 6 h | 1  | 94   | <b>26</b> |
| MIL-101-NH <sub>2</sub>                                                              | H <sub>2</sub> O/toluene / 353 K / 6 h | 1  | 93   | <b>26</b> |

|                                                                  |                                                        |    |       |           |
|------------------------------------------------------------------|--------------------------------------------------------|----|-------|-----------|
| NUC-130                                                          | DMSO / 55 °C / 5 h.                                    | 5  | 99    | <b>27</b> |
| NUC-53                                                           | DMSO/ 70 °C / 6 h                                      | 5  | 98    | <b>28</b> |
| AF-SN1/2                                                         | water/ 25 °C/ 2.5-5 h                                  | 10 | 95    | <b>29</b> |
| PANF-EC3/2                                                       | water/ 25°C-80°C / 6 h                                 | 10 | 97    | <b>30</b> |
| 1-Tb                                                             | water/ 60°C / 6 h                                      | 1  | 98    | <b>31</b> |
| 1-Yb                                                             | water/ 60°C / 6 h                                      | 5  | 97    | <b>31</b> |
| ZIF-90@ZIF-67                                                    | H <sub>2</sub> O/toluene /353 K / 12 h                 | 5  | 99.9  | <b>32</b> |
| MIL-101(Cr)@PMF                                                  | H <sub>2</sub> O /353 K / 12 h                         | 5  | 99.9  | <b>33</b> |
| NUC-51a                                                          | DMSO/ 70°C / 4 h                                       | 5  | 99.9  | <b>34</b> |
| SSICG-14                                                         | solvent-free / 70°C / 4 h                              | 5  | 99    | <b>35</b> |
| NUC-55                                                           | DMSO / 70°C / 6 h                                      | 5  | 99.33 | <b>36</b> |
| YS-CLPS-SO <sub>3</sub> H@ZIF-8                                  | H <sub>2</sub> O / acetonitrile / 80 °C / 12 h.        | 10 | 94    | <b>37</b> |
| PCN-222-Co@TpPa-1                                                | DMSO / 50 °C / 10 h.                                   | 5  | 99.3  | <b>38</b> |
| SO <sub>3</sub> H-AEPTMS@MCM-41                                  | Ethyl cyanoacetate, H <sub>2</sub> O / 80 °C /<br>1 h. | 5  | 94.9  | <b>39</b> |
| Ca-Zr/Ti-HMS-T                                                   | Toluene / 90 °C / 9 h.                                 | 10 | 99.9  | <b>40</b> |
| 0.5NH <sub>2</sub> /0.5SO <sub>3</sub> H- C <sub>12</sub> /JMSNs | Toluene, H <sub>2</sub> O/ 80 °C / 3 h.                | 5  | 100   | <b>41</b> |
| SO <sub>3</sub> H-NH <sub>2</sub> -HMS-2x                        | ethyl cyanoacetate / 80 °C / 5 h.                      | 3  | 95.2  | <b>42</b> |
| HMS-Al@MS-NH <sub>2</sub>                                        | Toluene, ethyl cyanoacetate / 110<br>°C / 2 h.         | 4  | 100   | <b>43</b> |

|                     |                                                                                       |    |    |                      |
|---------------------|---------------------------------------------------------------------------------------|----|----|----------------------|
| <b>CTP-DABA-COF</b> | <b>deacetalization–Knoevenagel<br/>condensation:</b><br>H <sub>2</sub> O / 50°C / 5 h | 10 | 99 | <b>This<br/>work</b> |
| <b>CTP-DABA-COF</b> | <b>Multicomponent tandem:</b><br>H <sub>2</sub> O, EtOH / 50°C / 7 h                  | 5  | 96 | <b>This<br/>work</b> |

**Table S6.** The deacetalization–Knoevenagel reactions among various benzaldehyde dimethyl acetals catalysed by **CTP-DABA-COF**.

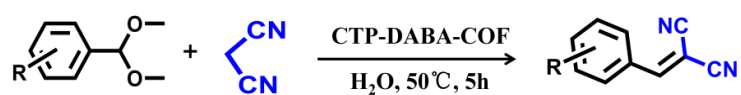

| Entry | R     | Catalyst | Temperature | Time | Yield |
|-------|-------|----------|-------------|------|-------|
| 1     | 4-Me  | 1.0 mol% | 50°C        | 5 h  | 99%   |
| 2     | 4-OMe | 1.0 mol% | 50°C        | 5 h  | 99%   |
| 3     | 4-F   | 1.0 mol% | 50°C        | 5 h  | 99%   |
| 4     | 4-Cl  | 1.0 mol% | 50°C        | 5 h  | 98%   |
| 5     | 4-Br  | 1.0 mol% | 50°C        | 5 h  | 99%   |
| 6     | 2-Me  | 1.0 mol% | 50°C        | 5 h  | 99%   |
| 7     | 2-F   | 1.0 mol% | 50°C        | 5 h  | 96%   |
| 8     | 2-Cl  | 1.0 mol% | 50°C        | 5 h  | 99%   |
| 9     | 3-Br  | 1.0 mol% | 50°C        | 5 h  | 99%   |

<sup>a</sup> Reaction conditions: benzaldehyde dimethylacetal (150  $\mu$ L, 1.0 mmol) and malononitrile (66 mg, 1.0 mmol) in the presence of **CTP-DABA-COF** (11.9 mg, 1 mol %), the mixture was stirred for 5 h at H<sub>2</sub>O (2 mL).

<sup>b</sup> Yield was determined by GC analysis.

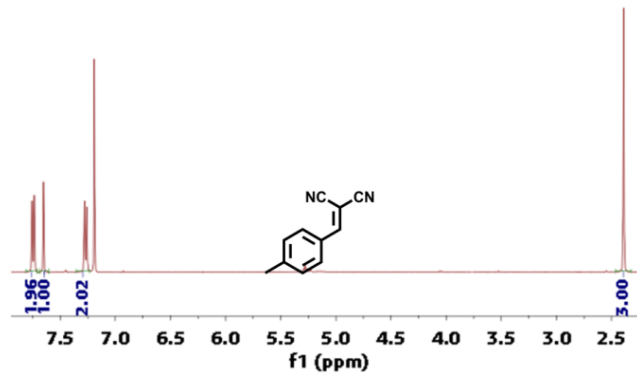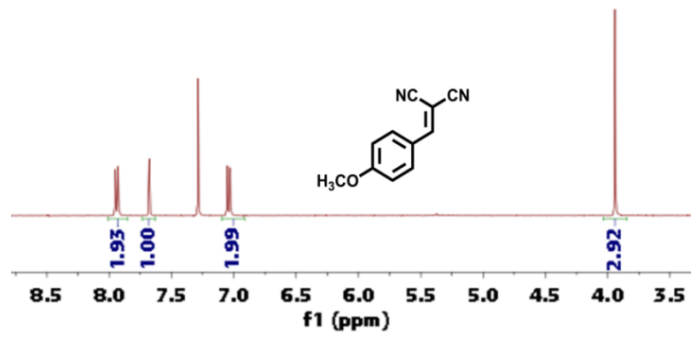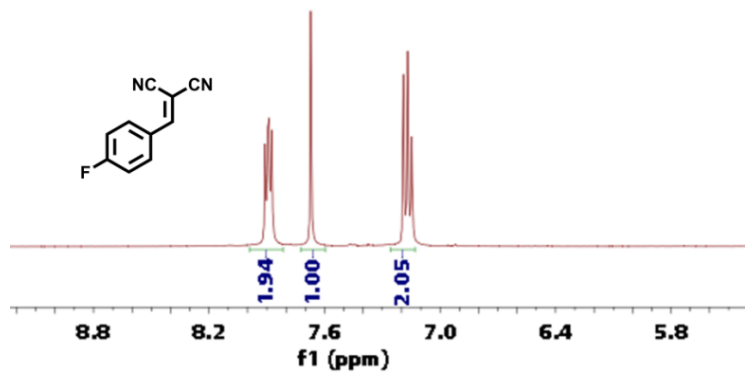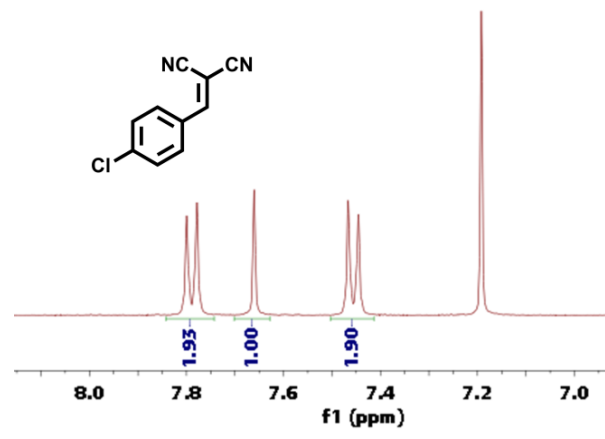

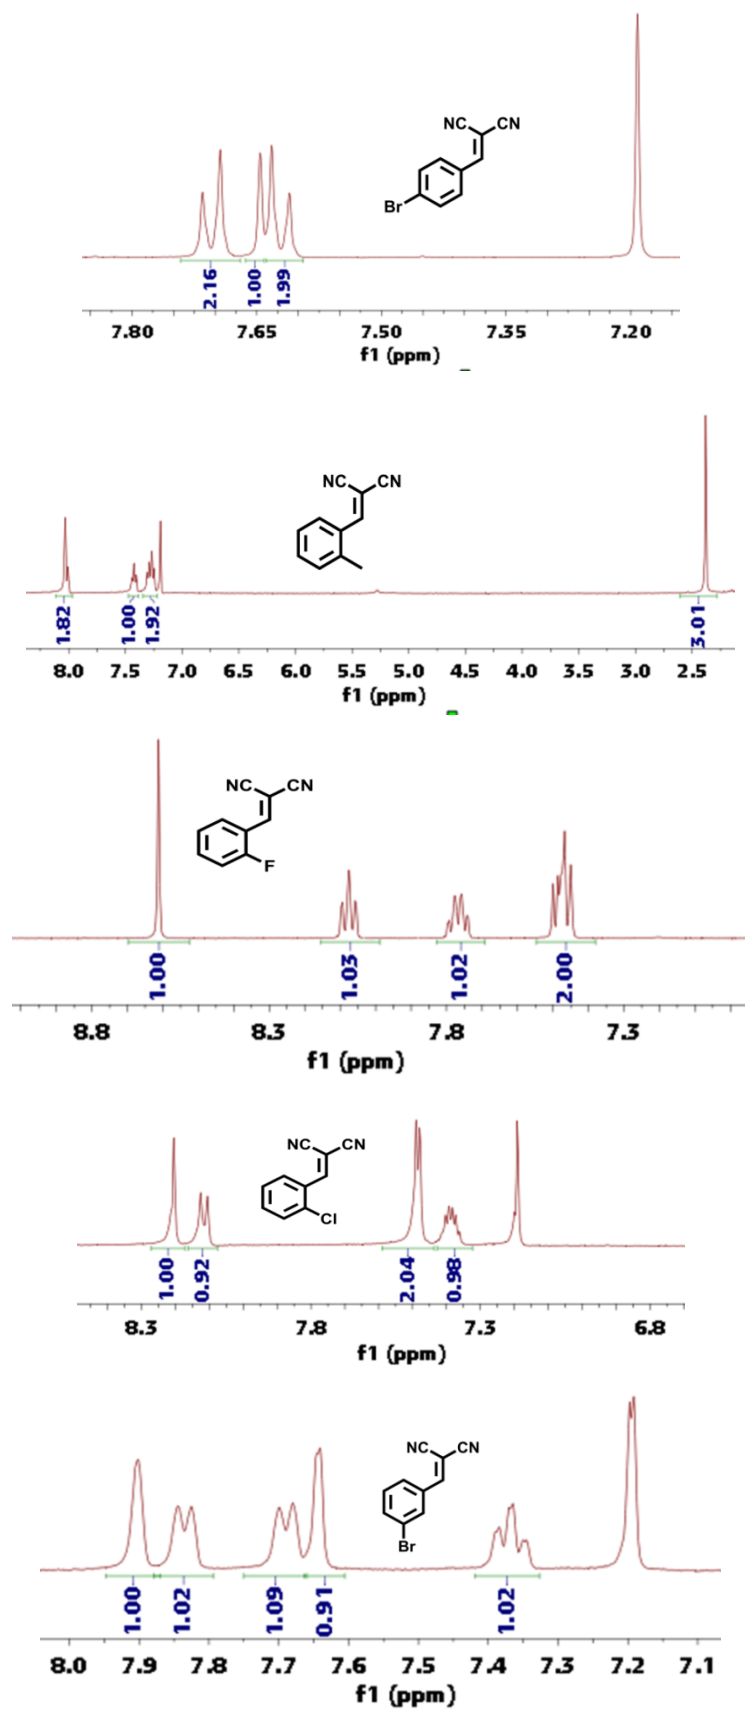

Fig. S13  $^1\text{H}$  NMR spectra of catalytic product various benzylidenemalononitrile.

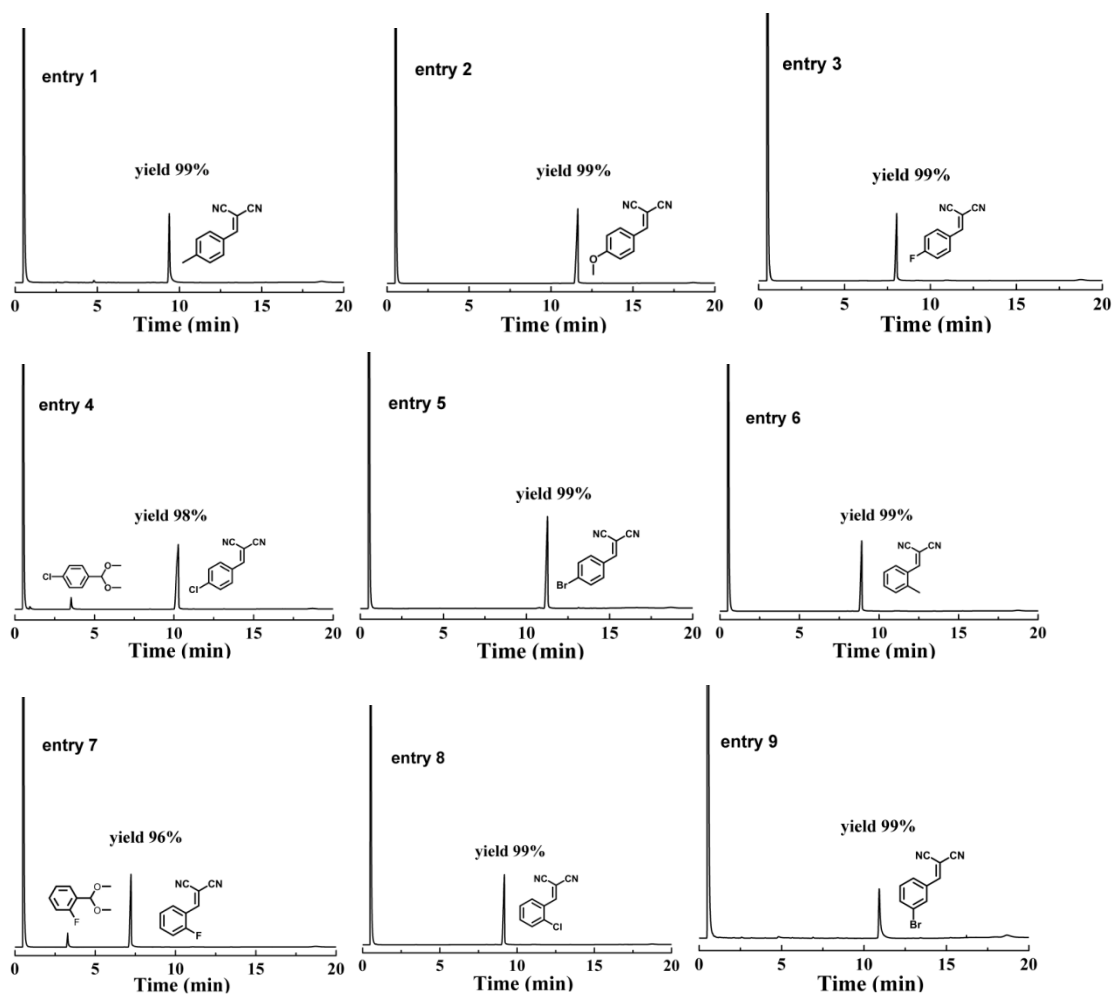

**Fig. S14** GC analysis: the scope of the catalytic system was explored by performing the reactions of various substituted benzylidenemalononitrile.

**Table S7.** Optimization of the multicomponent tandem reactions conditions. <sup>a</sup>

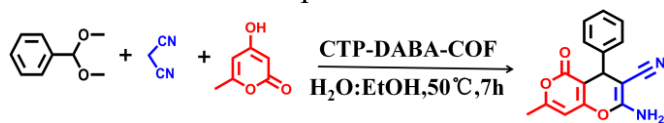

| Entry | Catalyst | Solvent                   | Time | Temperature | Yield <sup>b</sup> |
|-------|----------|---------------------------|------|-------------|--------------------|
| 1     | 1.0mol%  | solvent-free              | 7h   | 50°C        | 70%                |
| 2     | 1.0mol%  | THF                       | 7h   | 50°C        | 35%                |
| 3     | 1.0mol%  | 1,4-dioxane               | 7h   | 50°C        | 33%                |
| 5     | 1.0mol%  | EtOH                      | 7h   | 50°C        | 82%                |
| 6     | 1.0mol%  | MeCN                      | 7h   | 50°C        | 30%                |
| 7     | 1.0mol%  | H <sub>2</sub> O          | 7h   | 50°C        | 65%                |
| 8     | 1.0mol%  | H <sub>2</sub> O:EtOH=1:1 | 7h   | 50°C        | 96%                |
| 9     | 1.0mol%  | H <sub>2</sub> O:EtOH=1:1 | 7h   | 60°C        | 96%                |

|    |              |                           |    |      |     |
|----|--------------|---------------------------|----|------|-----|
| 10 | 0.5mol%      | H <sub>2</sub> O:EtOH=1:1 | 7h | 60°C | 58% |
| 11 | No Catalysis | H <sub>2</sub> O:EtOH=1:1 | 7h | 50°C | 1%  |

a Reaction conditions: benzaldehyde dimethylacetal (150  $\mu$ L, 1.0 mmol) and malononitrile (66 mg, 1.0 mmol) in the presence of **CTP-DABA-COF** (11.9 mg, 1 mol %), the mixture was stirred for 7 h at H<sub>2</sub>O (2 mL).

b Reaction was monitored by isolated yields.

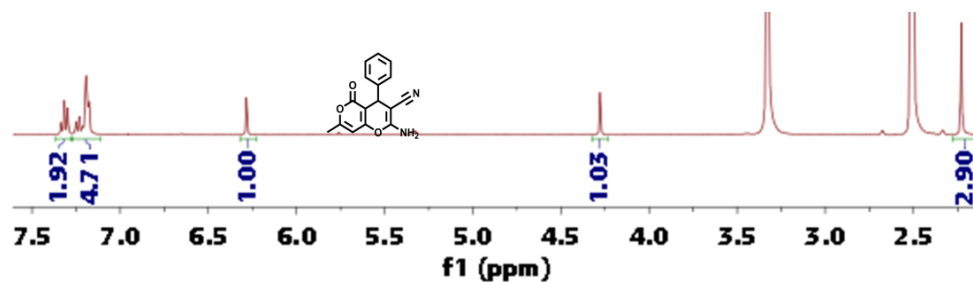

**Fig. S15** <sup>1</sup>H NMR spectra of 2-amino-7-methyl-5-oxo-4-phenyl-4H-pyrano[3,2-c]pyran-3-carbonitrile in DMSO-d<sub>6</sub>.

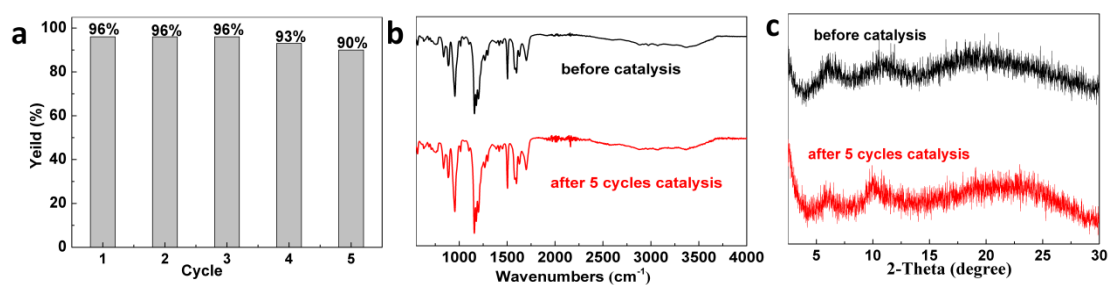

**Fig. S16** The FT-IR (b) and PXRD (c) of **CTP-DABA-COF** after five runs.

**Table S8.** The multicomponent tandem reactions among various benzaldehyde dimethyl acetals catalysed by **CTP-DABA-COF**.

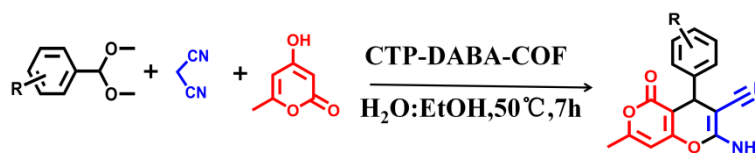

| Entry | R     | Solvent                   | Temperature | Time | Yield |
|-------|-------|---------------------------|-------------|------|-------|
| 1     | 4-Me  | H <sub>2</sub> O:EtOH=1:1 | 50°C        | 7 h  | 96%   |
| 2     | 4-OMe | H <sub>2</sub> O:EtOH=1:1 | 50°C        | 7 h  | 96%   |
| 3     | 4-F   | H <sub>2</sub> O:EtOH=1:1 | 50°C        | 7 h  | 95%   |
| 4     | 4-Cl  | H <sub>2</sub> O:EtOH=1:1 | 50°C        | 7 h  | 92%   |
| 5     | 4-Br  | H <sub>2</sub> O:EtOH=1:1 | 50°C        | 7 h  | 90%   |

|   |      |                           |      |     |     |
|---|------|---------------------------|------|-----|-----|
| 6 | 2-Me | H <sub>2</sub> O:EtOH=1:1 | 50°C | 7 h | 95% |
| 7 | 2-F  | H <sub>2</sub> O:EtOH=1:1 | 50°C | 7 h | 89% |
| 8 | 2-Cl | H <sub>2</sub> O:EtOH=1:1 | 50°C | 7 h | 90% |
| 9 | 3-Br | H <sub>2</sub> O:EtOH=1:1 | 50°C | 7 h | 90% |

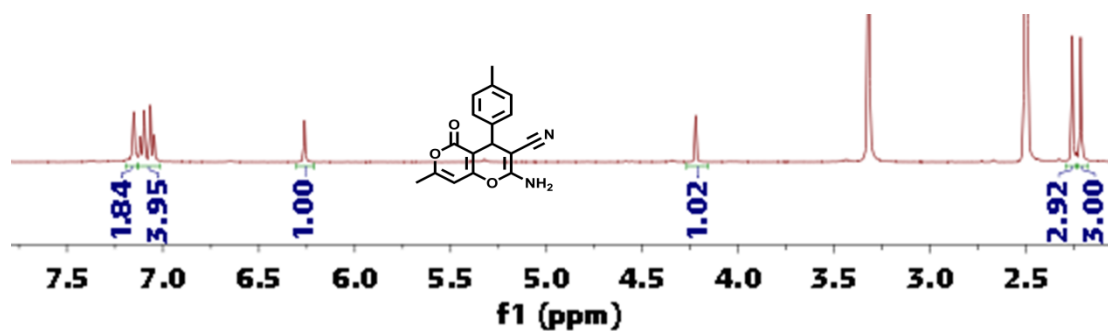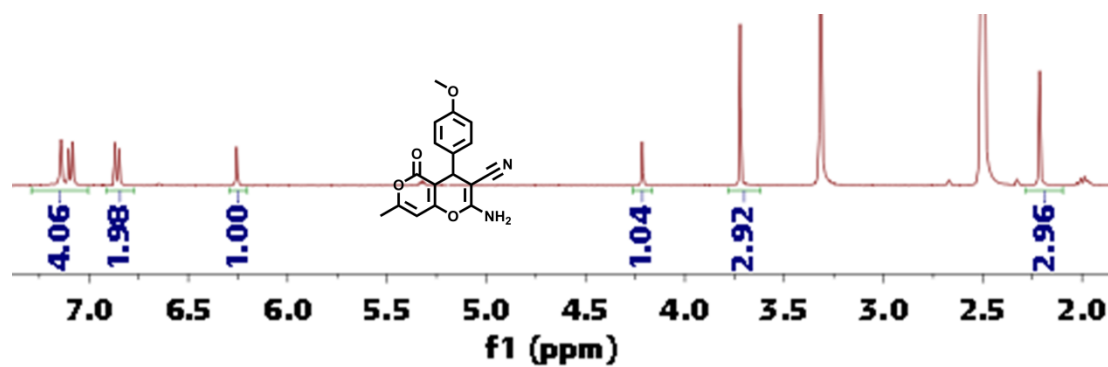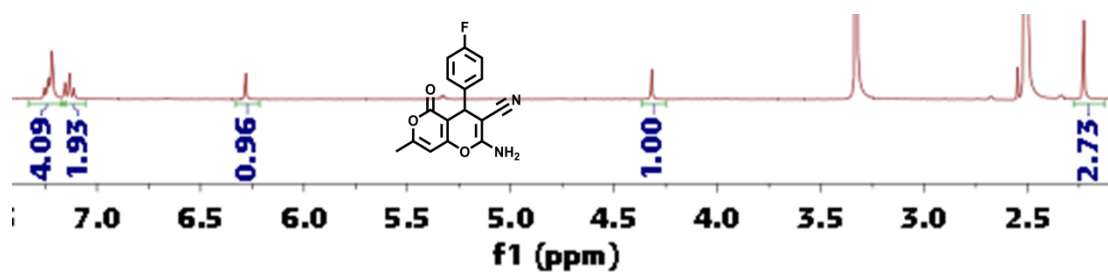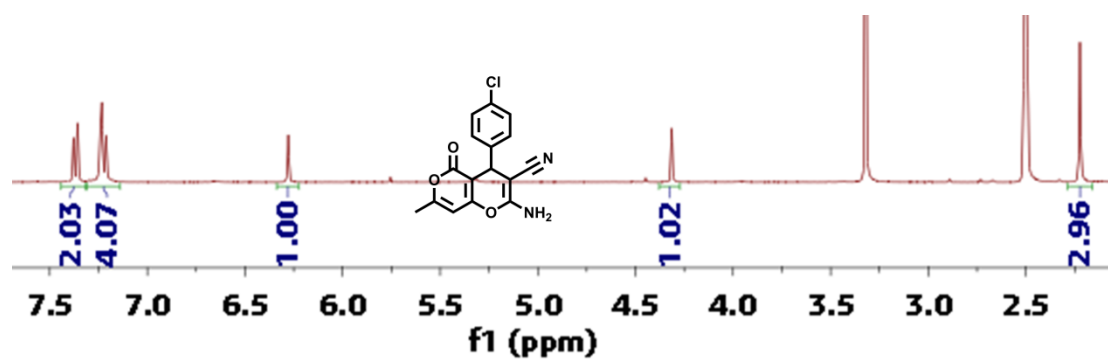

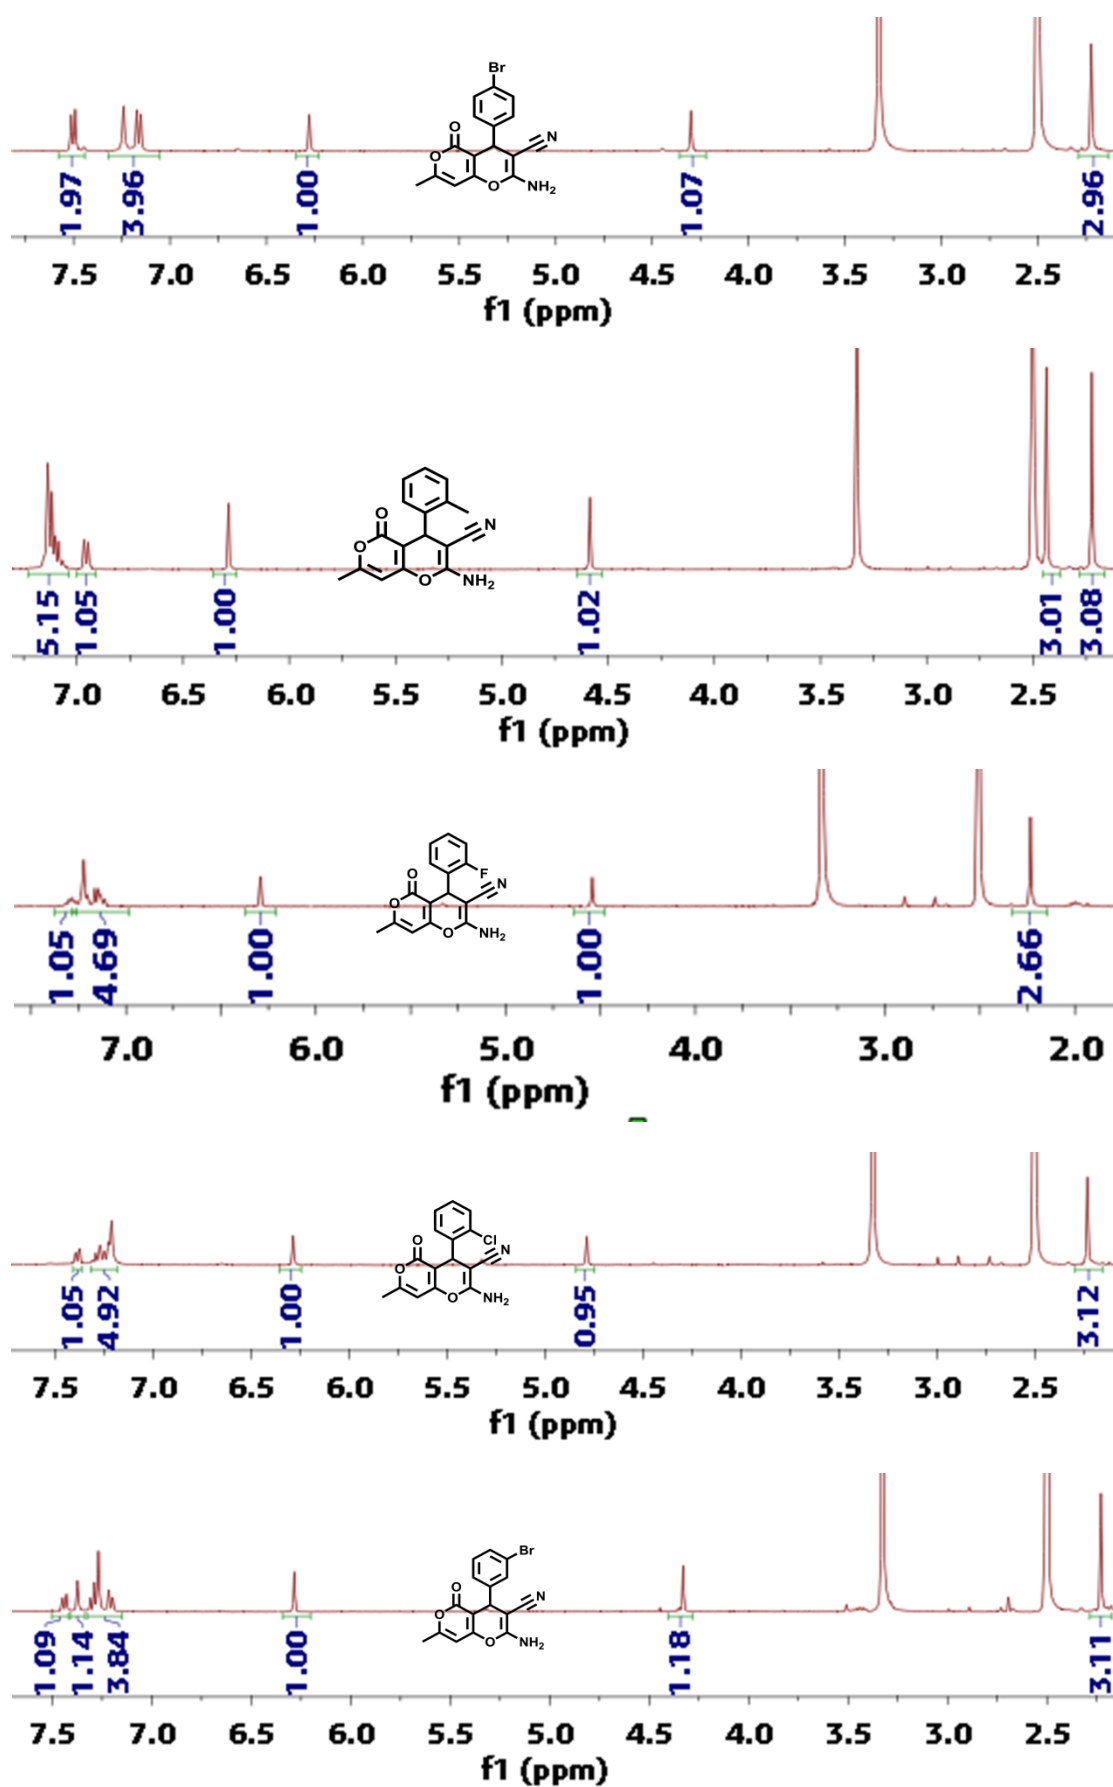

Fig. S17 <sup>1</sup>H NMR spectra of catalytic product various pyran heterocyclic complexes.

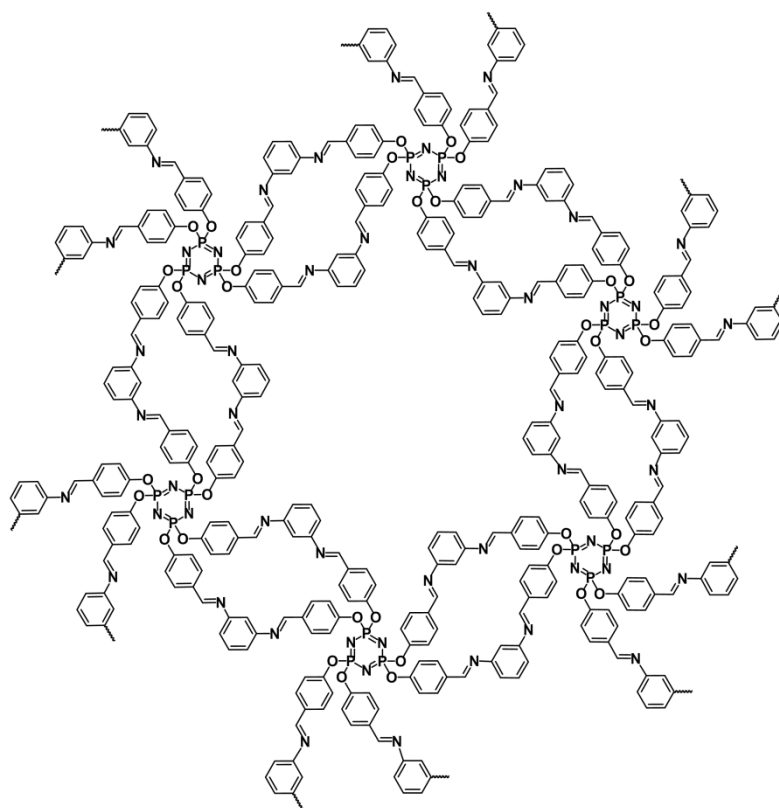

**Fig. S18** The structure of CTP -MPD-COF.

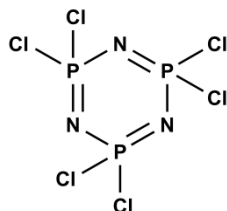

**Fig. S19** The structure of HCCTP.

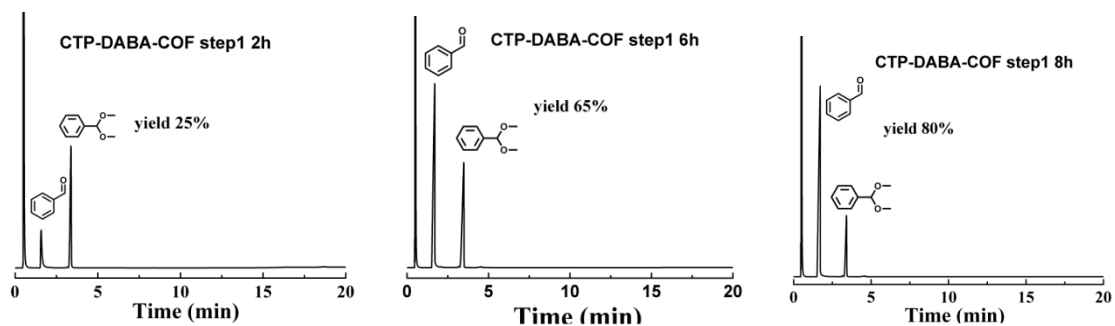

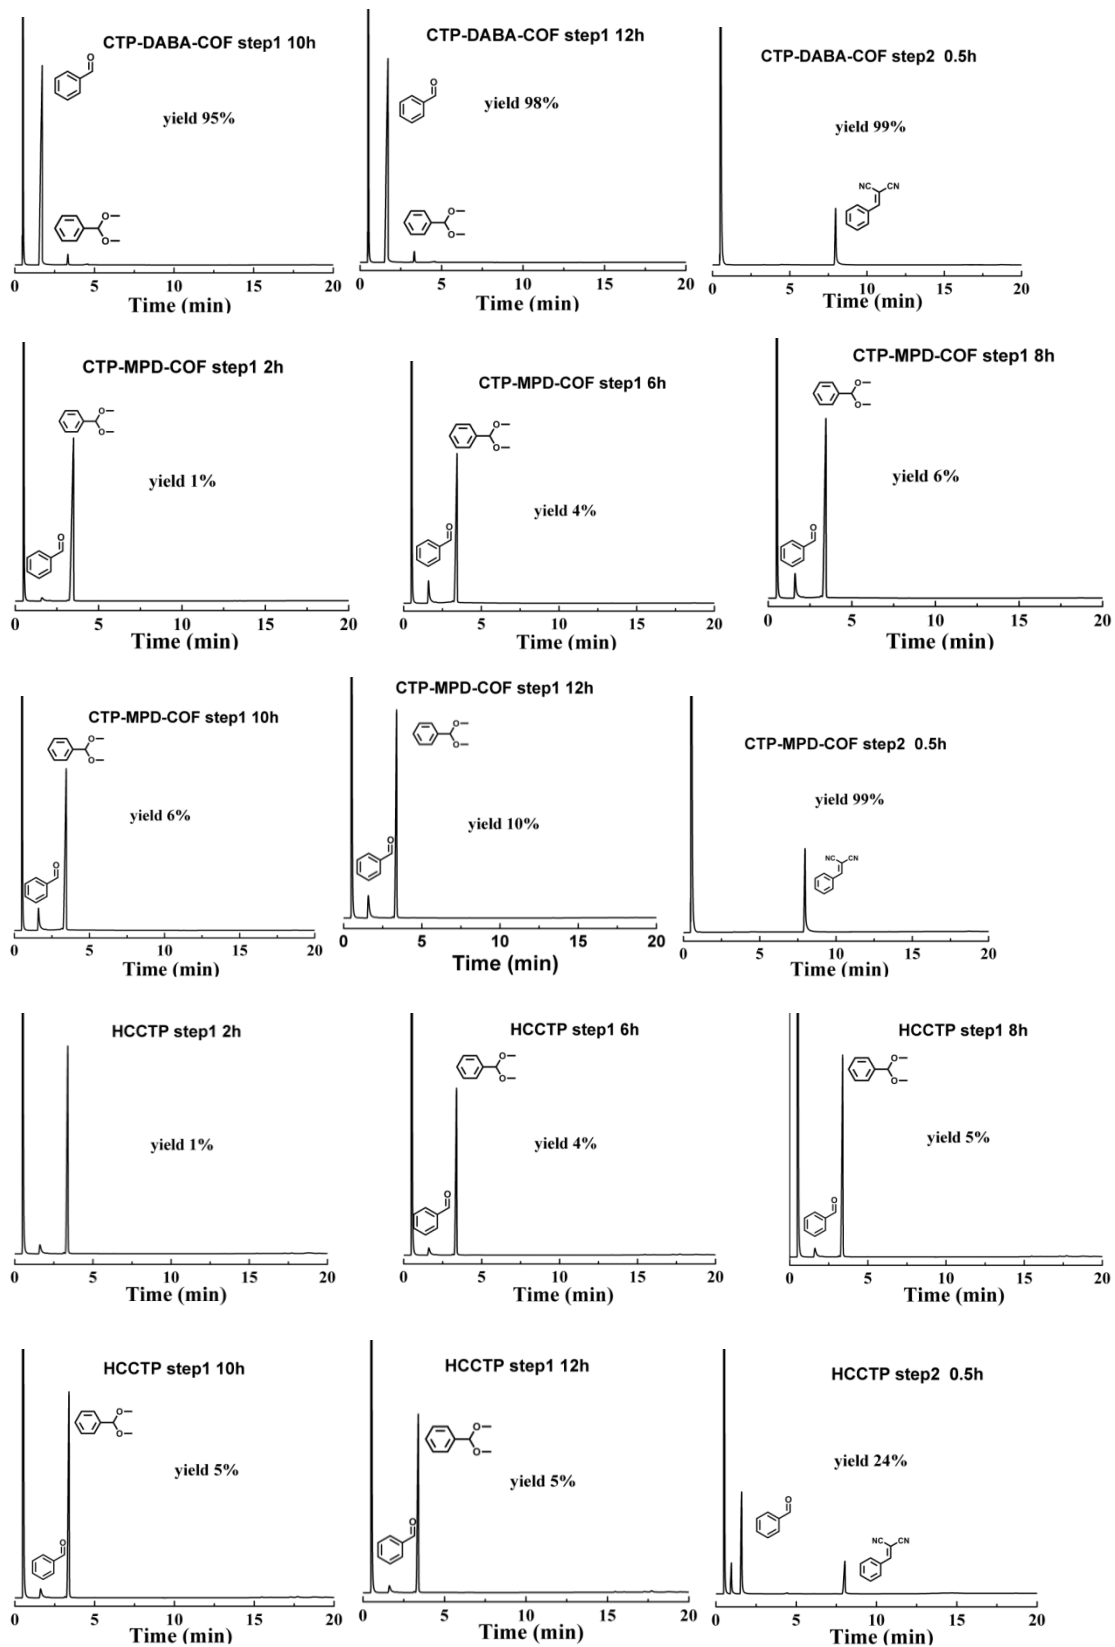

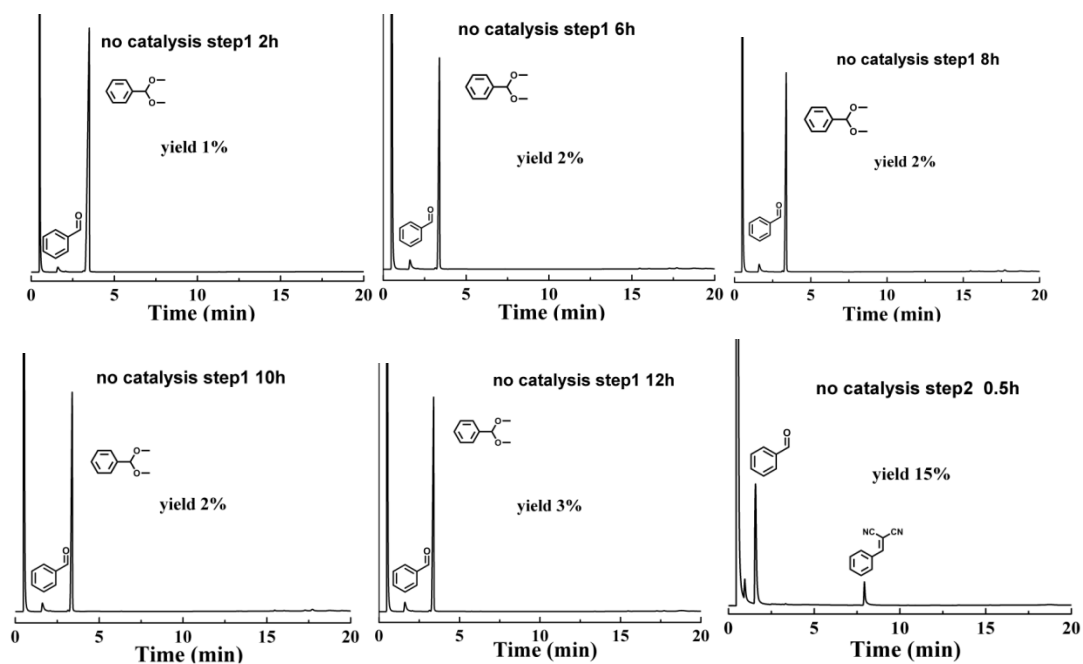

**Fig. S20** The GC of the deacetalization (Step 1) and the Knoevenagel condensation (Step2) by CTP-DABA-COF, CTP-DABA-COF, HCCTP and no catalysis.

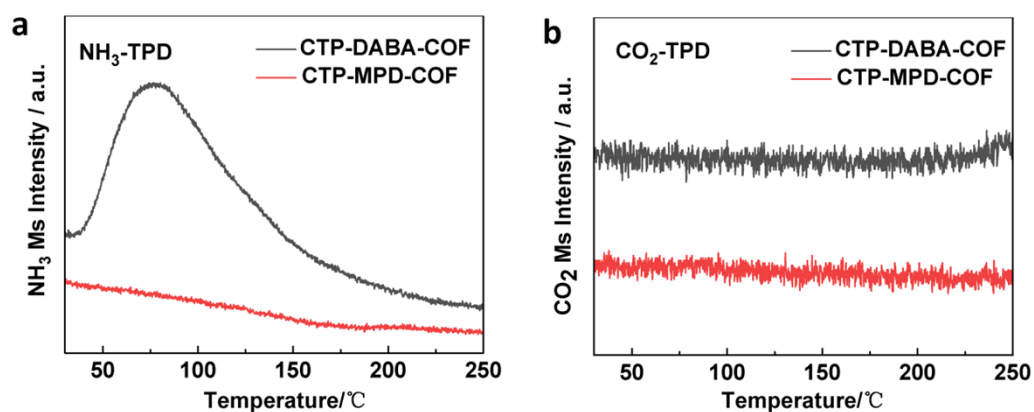

**Fig. S21** a)  $\text{NH}_3$ -TPD and b)  $\text{CO}_2$ -TPD by CTP-DABA-COF and CTP-MPD-COF.

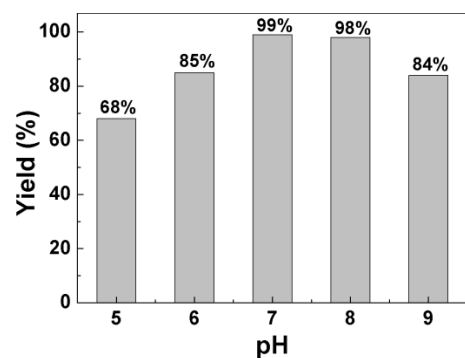

**Fig. S22** The comparative experiment of deacetalization-Knoevenagel reaction at different pH.

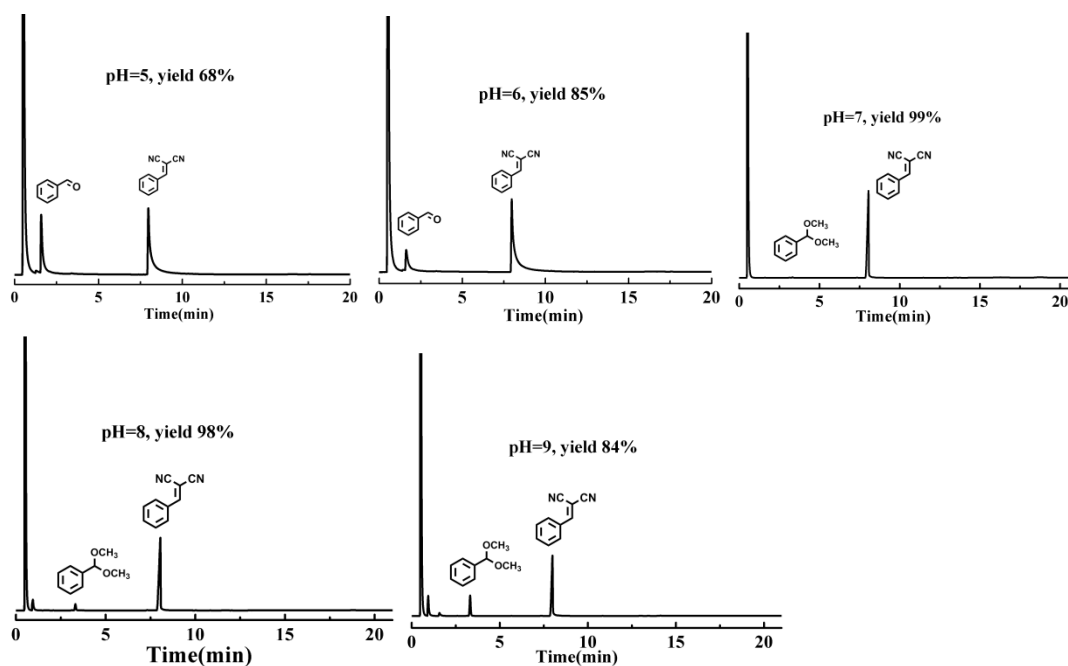

**Fig. S23** The GC of the deacetalization-Knoevenagel reaction at different pH.

## Reference

1. J. W. Cleveland, D. R. Kumar, J. Cho, S. S. Jang, C. W. Jones, *Catal. Sci. Technol.*, 2021, **11**, 1311-1322.
2. S. Rat, A. Chavez-Sanchez, M. Jerigová, D. Cruz, M. Antonietti, *ACS Appl. Polym. Mater.*, 2021, **3**, 2588-2597.
3. Z. S. Zhao, Y. Zhang, T. Fang, Z. B. Han, F. S. Liang, *ACS Appl. Nano Mater.*, 2020, **3**, 6316-6320.
4. J. Wu, G. G. Chang, Y. Q. Peng, X. C. Ma, S. C. Ke, S. M. Wu, Y. X. Xiao, G. Tian, T. Xia, X. Y. Yang, *Chem. Commun.*, 2020, **56**, 6297-6300.
5. A. Karmakar, M. M. A. Soliman, G. M. D. M. Rúbio, M. F.C. G. Silva, A. J. L. Pombeiro, *Dalton Trans.*, 2020, **49**, 8075-8085.
6. L. Feng, Y. Wang, K. Zhang, K. Y. Wang, W. Fan, X. Wang, J. A. Powell, B. Guo, F. Dai, L. Zhang, R. Wang, D. Sun, H. C. Zhou, *Angew. Chem. Int. Ed.*, 2019, **58**, 16682-16690.
7. S. B. Peh, Y. Cheng, J. Zhang, Y. Wang, G. H. Chan, J. Wang, D. Zhao, *Dalton Trans.*, 2019, **48**, 7069-7073.
8. M. L. Gao, M. H. Qi, L. Liu, Z. B. Han, *Chem. Commun.*, 2019, **55**, 6377-6380.
9. Y. Zhang, Y. Wang, L. Liu, N. Wei, M. L. Gao, D. Zhao, Z. B. Han, *Inorg. Chem.* 2018, **57**, 2193-2198.
10. H. He, D. Y. Zhang, F. Guo, F. Sun, *Inorg. Chem.*, 2018, **57**, 7314-7320.
11. J. Zhao, B. Lin, Y. Zhu, Y. Zhou, H. Liu, *Catal. Sci. Technol.* 2018, **8**, 5900-5905.
12. H. Li, Q. Pan, Y. Ma, X. Guan, M. Xue, Q. Fang, Y. Yan, V. Valchev, S. Qiu, *J. Am. Chem. Soc.*, 2016, **138**, 14783-14788.
13. B. Li, D. Ma, Y. Li, Y. Zhang, G. Li, Z. Shi, S. Feng, M. J. Zaworotko, S. Ma, *Chem. Mater.*, 2016, **28**, 4781-4786.
14. H. Yang, L. Fu, L. Wei, J. Liang, B. P. Binks, *J. Am. Chem. Soc.*, 2015, **137**, 1362-1371.

15. D. B. Shinde, S. Kandambeth, P. Pachfule, R. R. Kumar, R. Banerjee, *Chem. Commun.*, 2015, **51**, 310-313.
16. E. Merino, E. Verde-Sesto, E. M. Maya, A. Corma, M. Iglesias, F. Sánchez, *Appl. Catal. A: Gen.*, 2014, **469**, 206-212.
17. L. Xu, C. Li, K. Zhang, P. Wu, *ACS Catal.*, 2014, **4**, 2959-2968.
18. E. Merino, E. Verde-Sesto, E. M. Maya, M. Iglesias, F. Sánchez, A. Corma, *Chem. Mater.*, 2013, **25**, 981-988.
19. N. R. Shiju, A. H. Alberts, S. Khalid, D. R. Brown, G. Rothenberg, *Angew. Chem. Int. Ed.*, 2011, **50**, 9615-9619.
20. K. Motokura, N. Fujita, K. Mori, T. Mizugaki, K. Ebitani, K. Kaneda, *J. Am. Chem. Soc.*, 2005, **127**, 9674-9675.
21. X.-T. Li, J. Zou, Q. Yu, Y. Liu, J.-R. Li, M.-J. Li, H.-C. Ma, G.-J. Chen and Y.-B. Dong, *Chem. Commun.*, 2022, **58**, 2508-2511.
22. M. Najafi and J. Janczak, *Appl. Organomet. Chem.*, 2023, **37**, e7229.
23. M. Yang, Y.-S. Bao, M.-L. Zhou, S. Wang, Y.-H. Cui, W. Liu, L.-C. Li, L.-X. Meng, Y.-Y. Zhang and Z.-B. Han, *Catal. Lett.*, 2023, **153**, 3561-3568.
24. K. Stawicka, M. Zakrzewska, I. Sobczak, M. Ziolek and M. Trejda, *Appl. Surf. Sci.*, 2026, **728**, 166098.
25. A. Karmakar, M. M. A. Soliman, E. C. B. A. Alegria, M. F. C. G. da Silva and A. J. L. Pombeiro, *Catalysts*, 2022, **12**, 294.
26. Y.-S. Bao, W. Liu, Z.-L. Dong, Z.-Q. Xing, M. Yang, Y.-H. Cui, L.-X. Meng, L.-C. Li, X.-M. Xu, Z.-B. Han and Y.-Y. Zhang, *New J. Chem.*, 2023, **47**, 8906-8912.
27. C. Li, Y. Liu, T. Hu, Y. Gao, L. Fan and X. Zhang, *J. Mol. Struct.*, 2024, **1306**, 137849.
28. H. Chen, S. Liu, H. Lv, Q.-P. Qin and X. Zhang, *ACS Appl. Mater. Interfaces*, 2022, **14**, 18589-18599.
29. P. Li, H. Cui, Y. Chen, H. Rong, W. Ai, H. Qiao, Y. Liu, J. Zou, W. Zhang and M. Jiao, *Mol. Catal.*, 2024, **561**, 114186.
30. Y. Chen, P. Li, Y. Yuan, S. Wang, S. Zhi, C. Yang, G. Gao, M. Liu, Y. Liu and M. Jiao, *Catal. Lett.*, 2025, **156**, 3.
31. X. Si, X. Pan, J. Xue, Q. Yao, X. Huang, W. Duan, Y. Qiu, J. Su, M. Cao and J. Li, *RSC Advances*, 2022, **12**, 33501-33509.
32. W. Liu, Y.-Q. Zhang, Z.-L. Dong, Z.-X. Chen, L. Li, X.-Y. Zhao, Y. Wu and Y.-Y. Zhang, *Chem. Eur. J.*, 2025, **31**, e202403363.
33. Y.-Y. Zhang, M.-L. Zhou, Y.-H. Cui, M. Yang, Y.-S. Bao, Y. Ye, D.-M. Tian, L.-Y. Liu and Z.-B. Han, *Inorg. Chem.*, 2022, **61**, 13678-13684.
34. H. Lv, L. Fan, H. Chen, X. Zhang and Y. Gao, *Dalton Trans.*, 2022, **51**, 3546-3556.
35. R. Patra, S. Mondal, T. Rom, Deepanshu, A. K. Paul and D. Sarma, *Inorg. Chem.*, 2025, **64**, 19607-19620.
36. T. Zhang, S. Liang, S. Jia, H. Cui, X. Wang and X. Zhang, *RSC Advances*, 2025, **15**, 17811-17818.
37. M. Shao, J. Xu, X. Wang, T. Lu, Y. Bai, X. Wang and X. Zhang, *Colloids Surf. A Physicochem. Eng. Asp.*, 2025, **725**, 137485.
38. M.-L. Gao, M.-H. Qi, L. Liu and Z.-B. Han, *Chem. Commun.*, 2019, **55**, 6377-6380.
39. S. Rana, S. Maddila, R. Pagadala and S. B. Jonnalagadda, *J. Porous Mater.*, 2015, **22**, 353-360.
40. M. Cai, X. Wang, Y. Fang, Y. Chen and L. Dai, *Inorg. Chem.*, 2021, **60**, 8924-8935.

41. M. Zhang, Y. Kong, Z. Liu, Y. Liu, H. Zhang and A. Ying, *Appl. Catal. A Gen.*, 2026, 717, 120900.
42. F. Shang, J. Sun, S. Wu, H. Liu, J. Guan and Q. Kan, *J. Colloid Interface Sci.*, 2011, 355, 190-197.
43. C. You, C. Yu, X. Yang, Y. Li, H. Huo, Z. Wang, Y. Jiang, X. Xu and K. Lin, *New J. Chem.*, 2018, 42, 4095-4101.
